# Supplementary material
Source: PubMed Central journal article supplement (PMC11440953)
Supplement: NIHMS2023037-supplement-Supplementary_Text.pdf [file NIHMS2023037-supplement-Supplementary_Text.pdf]

## 5 Supplementary Information

### 5.1 Supplementary Text

#### 5.1.1 The major spliceosome complex is strongly conserved between archaic hominins and modern humans.

Alternative splicing occurs across nearly all eukaryotes and its molecular mechanisms are deeply conserved [41]. Thus, we anticipated that the sequence patterns learned by SpliceAI in humans would generalize to archaic hominins. To test for any significant differences, we first compared the sequences of 147 genes associated with the major spliceosome complex [42] between archaic hominins and modern humans. Analyzing all archaic variants absent in the 1000 Genomes Project (1KG) [43], we identified 19 non-synonymous archaic-specific variants, only 5 possibly or probably damaging by PolyPhen 2 and 8 of which were predicted to be deleterious by SIFT; [45], (**Supplementary Data 1**). Additionally, only two variants were predicted to disrupt protein function by both PolyPhen and SIFT (**Supplementary Data 1**). Furthermore, both deleterious variants were unique to the Altai Neanderthal.

We also considered the extent to which modern humans harbor deleterious variants in spliceosome associated genes. We subset variants that fell within spliceosome genes in each of the randomly sampled 1KG individuals and repeated the above procedure. We also repeated this for the archaics and included all spliceosome variants, regardless of whether or not they were archaic-specific. Modern humans exhibited between 0 and 3 deleterious variants, whereas the Chagyrskaya Neanderthal, Denisovan, and Vindija Neanderthal had 0 and the Altai Neanderthal had the two aforementioned variants (**Supplementary Table 14**).

Therefore, the major spliceosome complex is nearly identical between archaic hominins and modern humans, and there is no evidence that the sequence determinants of splicing have diverged.

#### 5.1.2 Physical characteristics of a gene are associated with the number of SAVs.

Alternative splicing requires genes have at least one intron and the extent of splice altering variants may further be related to gene length. We considered the relationship between the the number of splicing variants ( $n = 0-11$ ) in each gene and three gene traits: 1) number of exons, 2) length of gene body, and 3) length of coding sequence. These characteristics were positively associated at both  $\Delta$  thresholds (**Supplementary Fig. 6**) (**Supplementary Table 6**). We also considered the relationship between the number of known isoforms per gene and the number of SAVs. We found a significant, positive association at both thresholds (**Supplementary Table 6**). However, this relationship is likely driven by the number of exons. When we conducted a partial correlation, controlling for the number of exons, both associations were non-significant with minimal effect size ( $\Delta \geq 0.2$ : partial Spearman,  $\rho = -0.003$ ,  $P = 0.702$ ,  $\Delta \geq 0.5$ : partial Spearman,  $\rho = 0.0008$ ,  $P = 0.9174$ ).

### 5.1.3 Sprime identifies more introgressed SAVs present in all five 1KG superpopulations.

Comparing our results using two different sets of introgressed variants [38, 39] revealed very similar patterns. For example, most ancient SAVs occurred at  $\geq 0.05$  frequency in all five 1KG superpopulations (**Supplementary Fig. 11**). The next most frequent were SAVs that were present in all but east Asians. SAVs shared among non-Africans and those present in all but Europeans were also common.

However, there were a few differences between the datasets in the distribution of introgressed SAVs across populations. We found that among those introgressed SAVs classified per [38], many were shared among non-Africans (**Fig. 5D**). However, introgressed SAVs classified per [39] were most commonly present in both Africans and non-Africans, followed by a smaller set of non-African SAVs (**Supplementary Fig. 14**). This difference likely reflects low frequency introgressed variants that are allowed to occur in the reference population in Sprime. While introgression between modern humans and archaics occurred outside of Africa, many Africans have low levels of Neanderthal ancestry due to backflow from Eurasians into Africans [94]. Among non-African subsets, both datasets were largely similar in their distribution (**Supplementary Figs. 14, 15**).

### 5.1.4 Ancient and introgressed sQTL SAVs have similar tissue activity patterns in GTEx.

To test for differences in the tissues of activity for SAVs of different origin, we compared the distribution of ancient and introgressed SAVs identified in GTEx (**Supplementary Table 15**). The number of sQTLs in each tissue was positively correlated between ancient and introgressed variants, and this held for both sets of introgressed variants (Browning et al. 2018: Spearman,  $\rho = 0.94$ ,  $P = 3.8 \times 10^{-24}$ ; Vernot et al. 2016: Spearman,  $\rho = 0.92$ ,  $P = 1.09 \times 10^{-20}$ ) (**Supplementary Fig. 22**). However, the ability to detect sQTL is strongly influenced by sample size, and we found that the number of individuals sampled for each tissue is positively correlated with the number of sQTL SAVs in a tissue for both ancient variants (Browning et al. 2018: Spearman,  $\rho = 0.91$ ,  $P = 5.73 \times 10^{-20}$ ; Vernot et al. 2016: Spearman,  $\rho = 0.91$ ,  $P = 8.43 \times 10^{-20}$ ) and introgressed variants (Browning et al. 2018: Spearman,  $\rho = 0.89$ ,  $P = 2.47 \times 10^{-17}$ ; Vernot et al. 2016: Spearman,  $\rho = 0.85$ ,  $P = 1.34 \times 10^{-14}$ ) (**Supplementary Figs. 23, 24**). We also note that the proportion of sQTL SAVs compared to all significant GTEx sQTLs detected per tissue was largely similar for most tissues (**Supplementary Fig. 25**). These results suggest that tissues of activity between SAVs of different allele origins are similar; however, these analyses are limited by the coverage and power of GTEx sQTL data.

We also considered tissue-level gene expression differences by comparing the number of genes expressed (TPM > 1) in each tissue with at least one SAV of a given origin. We found no significant differences among allele origins for either allele origin classification (**Supplementary Figs. 26, 27**). As for the sQTL, these patterns were mainly driven by differences in sample size and number of expressed genes in each GTEx tissue.

## 5.2 Supplementary Figures

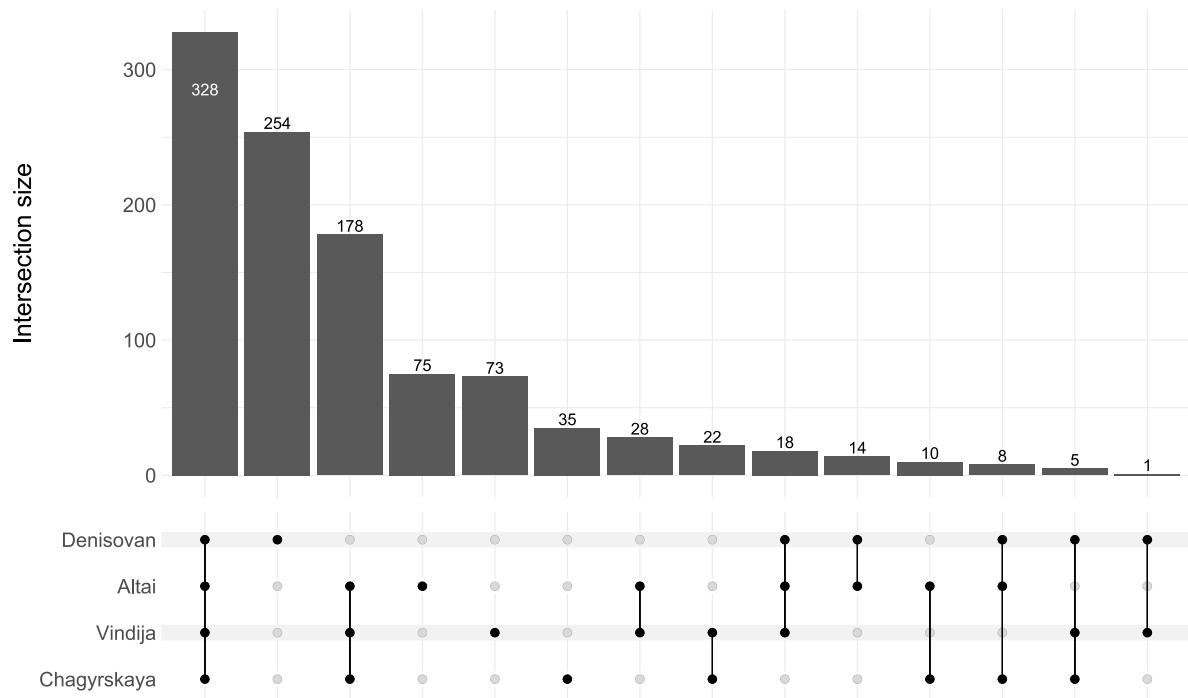

**Supplementary Fig. 1 | The distribution of SAVs is consistent with the archaic hominin phylogeny.** Unique and shared SAVs at  $\Delta \geq 0.5$ .

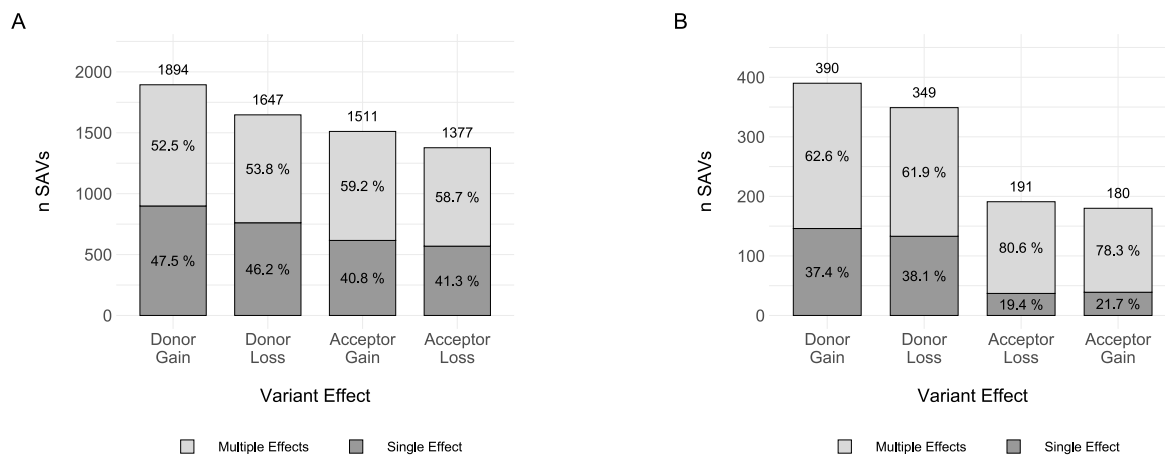

**Supplementary Fig. 2 | SAVs most commonly result in a donor gain.**

**(A)** The distribution of variant effects for all variants at the  $\Delta \geq 0.2$  threshold. The n above each column indicates the number of variants with that effect above the threshold. Some variants result in multiple effects; therefore, the sum of these classes  $\neq 5,950$ . The color in each stacked bar indicates whether the effect is unique (dark grey) or one of many effects (light grey). **(B)** The distribution of variant effects for all variants at the  $\Delta \geq 0.5$  threshold. As in **A**, some variants result in multiple effects; therefore, the sum of these classes  $\neq 1,049$ . The bar stacks are colored as in **A**.

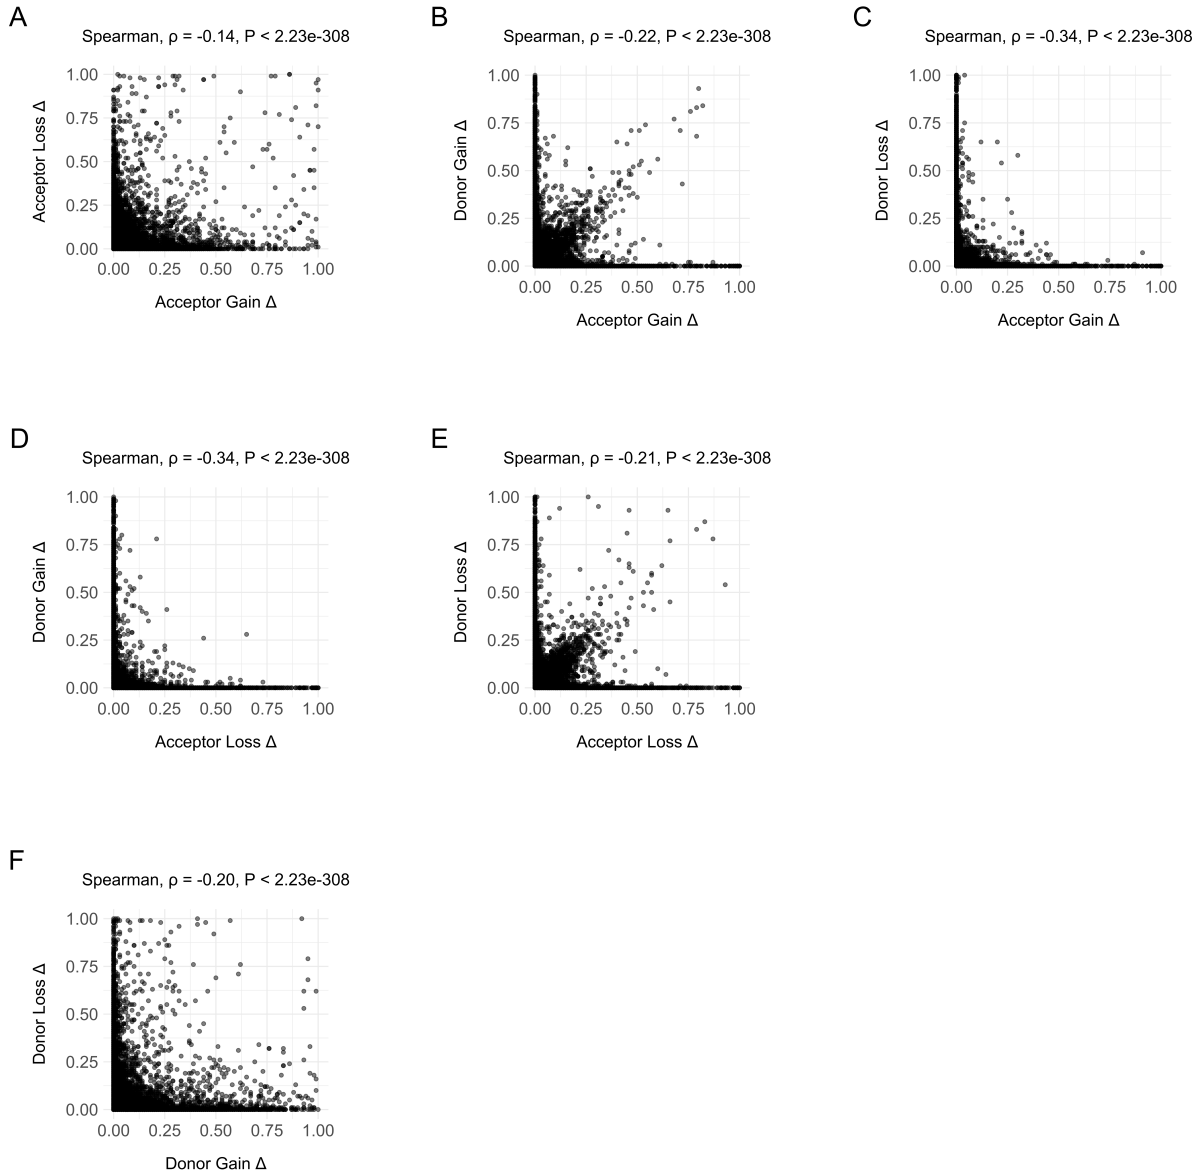

**Supplementary Fig. 3 | Delta scores between classes are negatively associated.**

(A) Association between acceptor gain  $\Delta$ s and acceptor loss  $\Delta$ s for all variants with at least one  $\Delta > 0$ . (B) Association between acceptor gain  $\Delta$ s and donor gain  $\Delta$ s for all variants with at least one  $\Delta > 0$ . (C) Association between acceptor gain  $\Delta$ s and donor loss  $\Delta$ s for all variants with at least one  $\Delta > 0$ . (D) Association between acceptor loss  $\Delta$ s and donor gain  $\Delta$ s for all variants with at least one  $\Delta > 0$ . (E) Association between acceptor loss  $\Delta$ s and donor loss  $\Delta$ s for all variants with at least one  $\Delta > 0$ . (F) Association between donor gain  $\Delta$ s and donor loss  $\Delta$ s for all variants with at least one  $\Delta > 0$ .

A

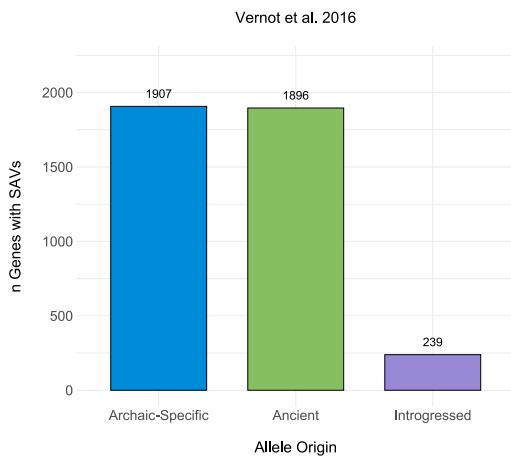

B

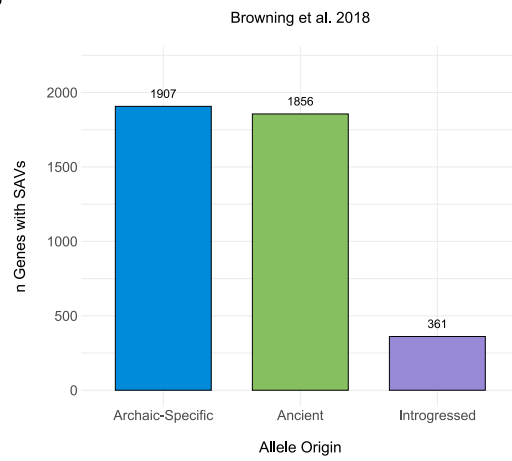

**Supplementary Fig. 4 | The number of genes with SAVs by allele origin.**

(A) The number of genes encompassed by each SAV allele origin per [39] at  $\Delta \geq 0.2$ . Some genes may occur in multiple categories. (B) The number of genes encompassed by each SAV allele origin per [38] at  $\Delta \geq 0.2$ . Some genes may occur in multiple categories.

A

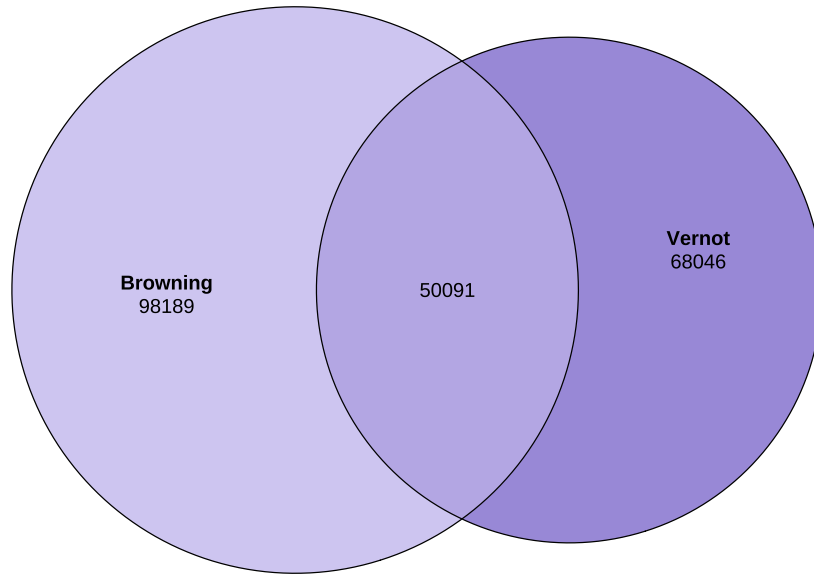

B

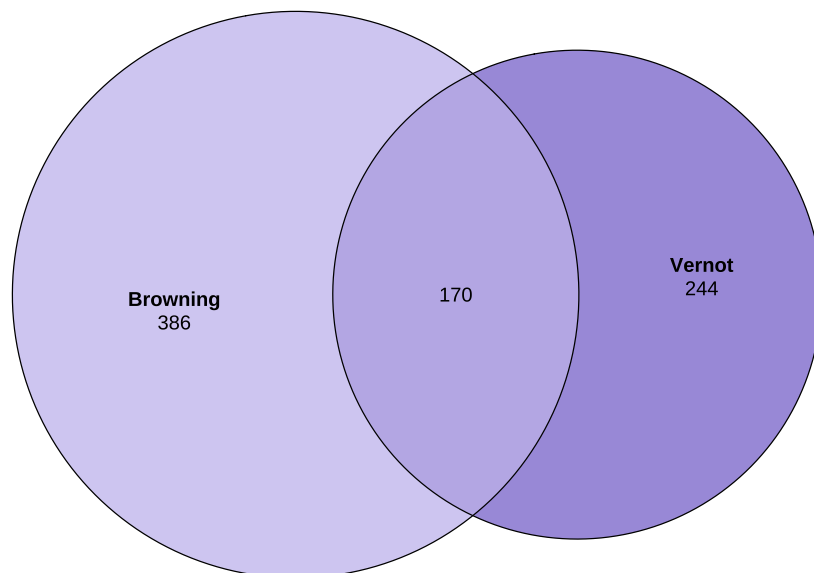

**Supplementary Fig. 5 | Two different sets of introgressed variants modestly overlap.**

(A) The overlap between introgressed variants from [39] and [38] that match a quality filtered locus in this study and are present in 1KG and/or gnomAD. (B) A subset of the overlap for variants with  $\Delta \geq 0.2$ .

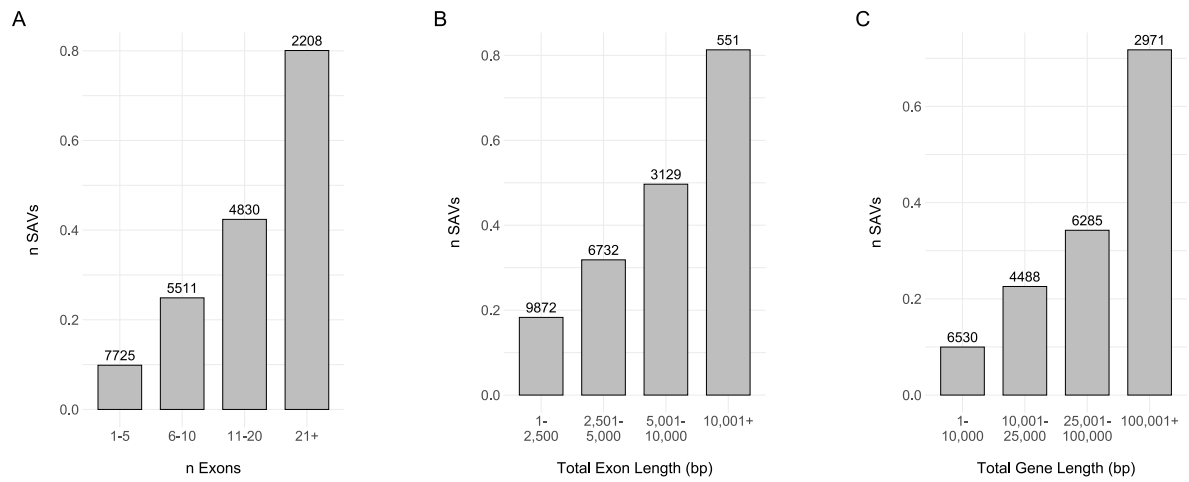

**Supplementary Fig. 6 | The number of exons and gene length are associated with more SAVs.**

**(A)** Binned number of exons and the mean number of SAVs at  $\Delta \geq 0.2$  per bin. n reflects the number of genes per bin. **(B)** Binned exon length in bp and the mean number of SAVs at  $\Delta \geq 0.2$  per bin. n reflects the number of genes per bin. **(C)** Binned gene length in bp and the mean number of SAVs at  $\Delta \geq 0.2$  per bin. n reflects the number of genes per bin.



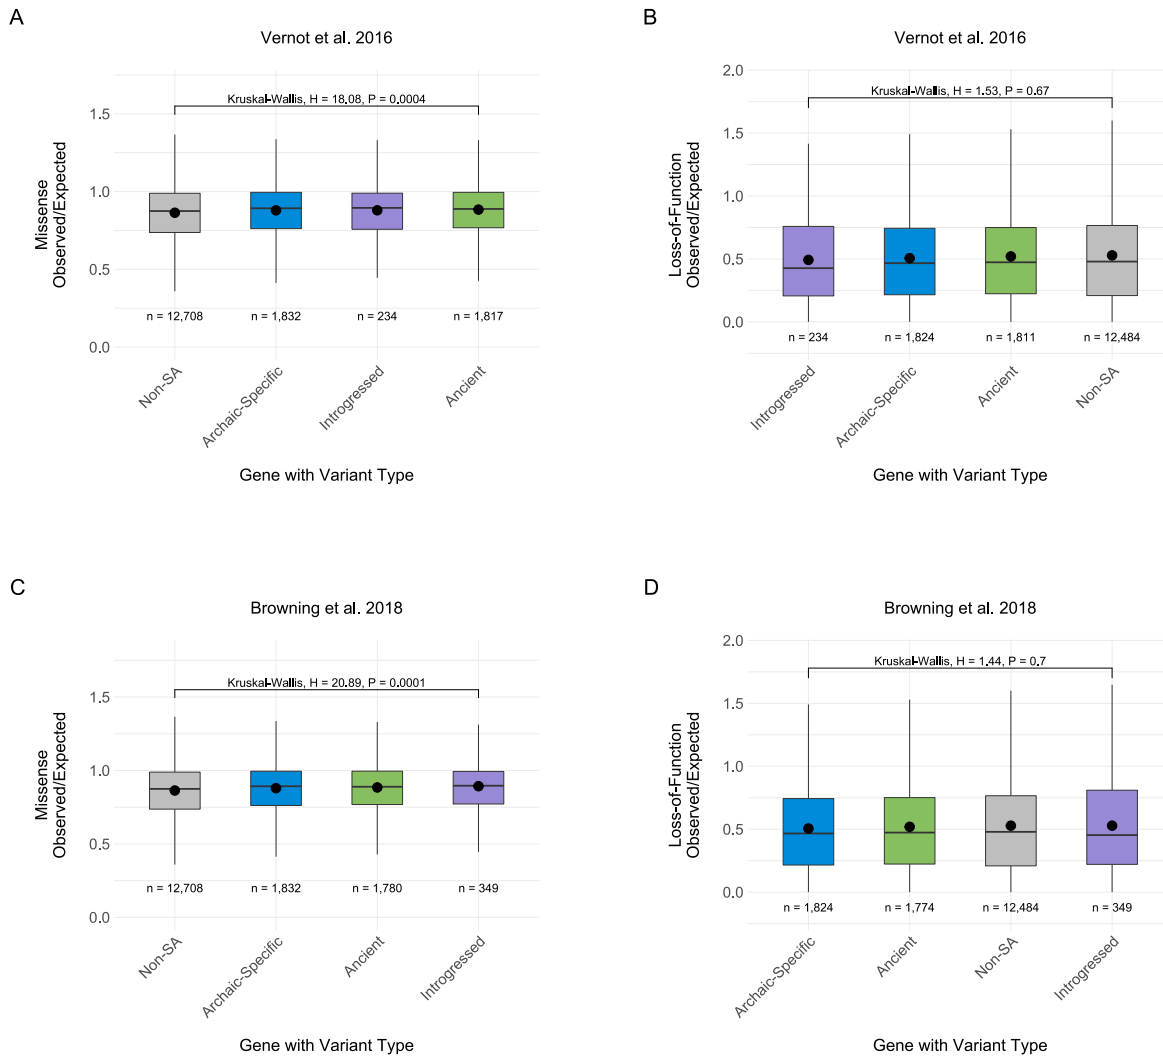

### Supplementary Fig. 7 | Gene mutational tolerance does not constrain the evolutionary history of SAVs.

(A) Observed over expected ratio for missense variants per gene from gnomAD among four different sets. The ancient, archaic-specific, and introgressed sets from [39] include any gene that had  $\geq 1$  SAV at the  $\Delta \geq 0.2$  threshold. Non-SA genes are all genes that do not occur in any of the other three sets. The boxplots display the median and IQR, with the upper whiskers extending to largest value  $\leq 1.5 \times$  IQR from the 75th percentile and the lower whiskers extending to the smallest values  $\leq 1.5 \times$  IQR from the 25th percentile. The mean is noted by the black point. Ns reflect the number of variants per set. (B) Observed over expected ratio for loss-of-function variants per gene from gnomAD among four different sets from [39]. The ancient, archaic-specific, and introgressed sets include any gene that had  $\geq 1$  SAV at the  $\Delta \geq 0.2$  threshold. Non-SA genes are all genes that do not occur in any of the other three sets. Data are visualized as in A. (C) Observed over expected ratio for missense variants per gene from gnomAD among four different sets from [38]. Data are visualized as in A. (D) Observed over expected ratio for loss-of-function variants per gene from gnomAD among four different sets from [38]. Data are visualized as in A.

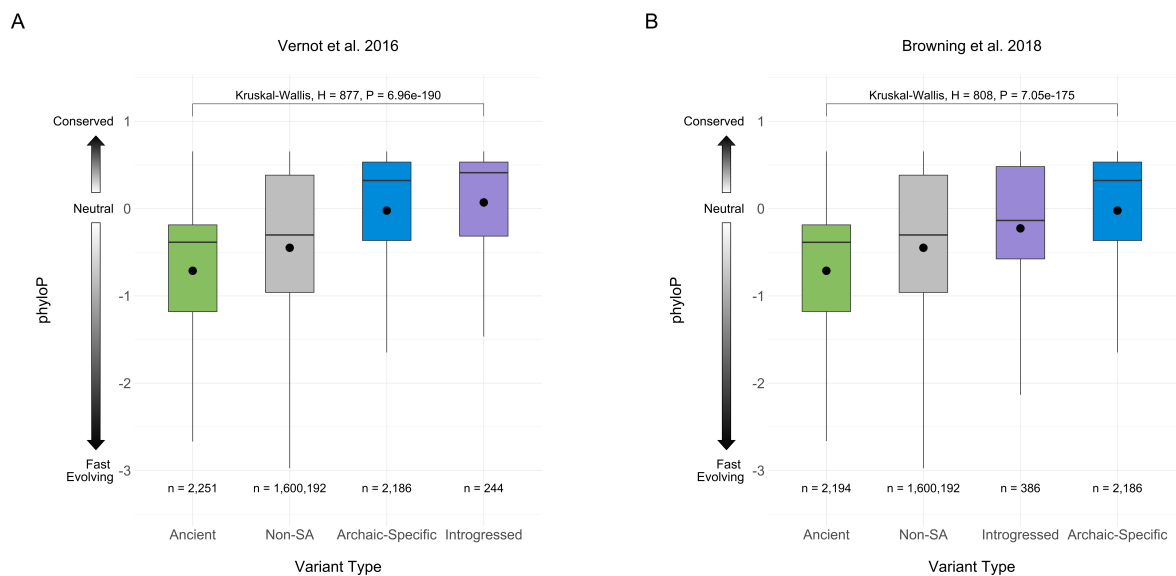

### Supplementary Fig. 8 | Site-level evolutionary conservation varies across SAVs with different origins.

**(A)** phyloP evolutionary conservation score distributions for archaic SAVs of different origins and non-SAVs. Positive scores indicate substitution rates slower than expected under neutral evolution (conservation), while negative scores indicate higher substitution rates than expected (fast evolution). The boxplots display the median and IQR, with the upper whiskers extending to largest value  $\leq 1.5 \times$  IQR from the 75th percentile and the lower whiskers extending to the smallest values  $\leq 1.5 \times$  IQR from the 25th percentile. Ns are the number of variants per set. SAV classifications were based on [38] introgression calls. **(B)** phyloP evolutionary conservation score distributions for archaic SAVs of different origins and non-SAVs based on [39] introgression calls. Data were visualized as in **A**.

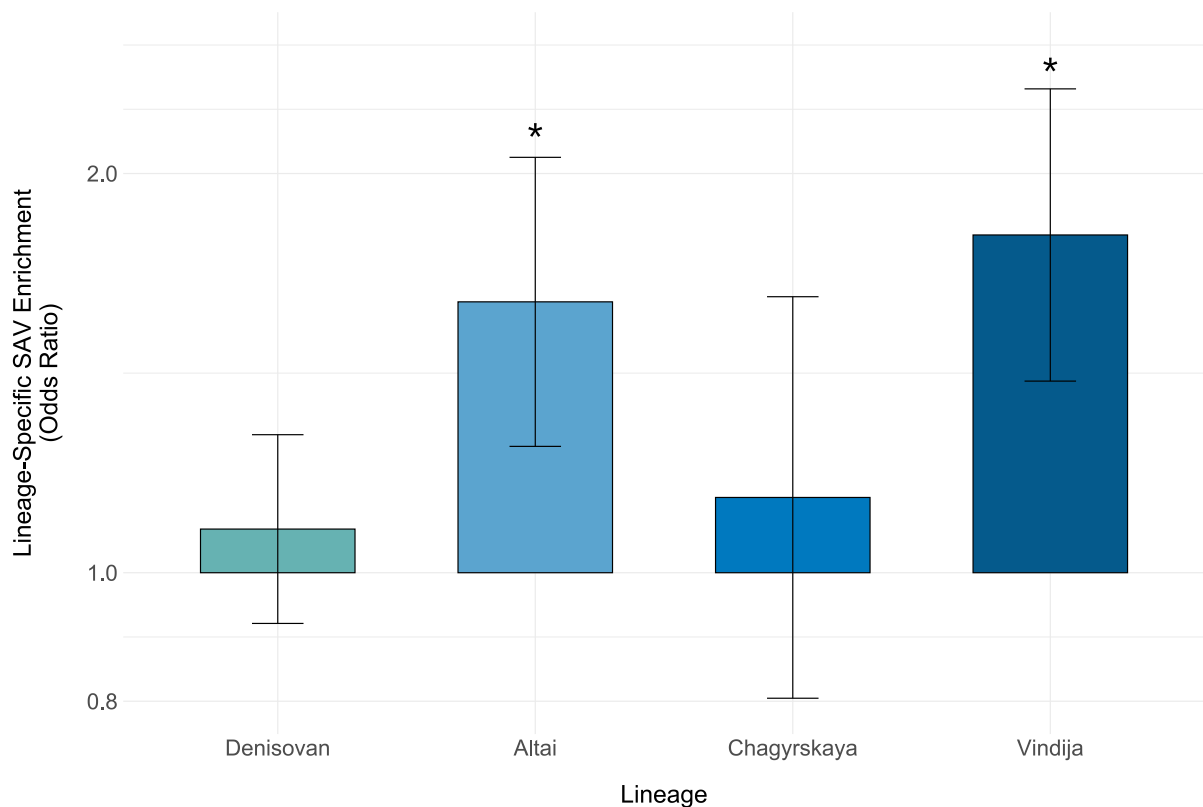

**Supplementary Fig. 9 | Lineage-specific high-confidence SAVs are enriched in two Neanderthals.** Odds ratios from Fisher's exact test performed for each lineage's unique high confidence SAVs/non-SAVs compared to those shared among all four individuals. Odds ratios were calculated from 81,916 Altai-specific, 53,765 Chagyrskaya-specific, 411,492 Denisovan-specific, 70,999 Vindija-specific, and 573,197 shared variants. The number of lineage-specific and shared SAVs/non-SAVs used in each enrichment test are listed in **Supplementary Table 9**. Bar height indicates the odds ratio. Error bars denote the 95% CI and are centered on the odds ratio. Asterisks reflect significance of Fisher's exact tests using a Bonferroni corrected  $\alpha$  (0.0125). Error bars denote the 95% CI. Note the y-axis is  $\log_{10}$  transformed.

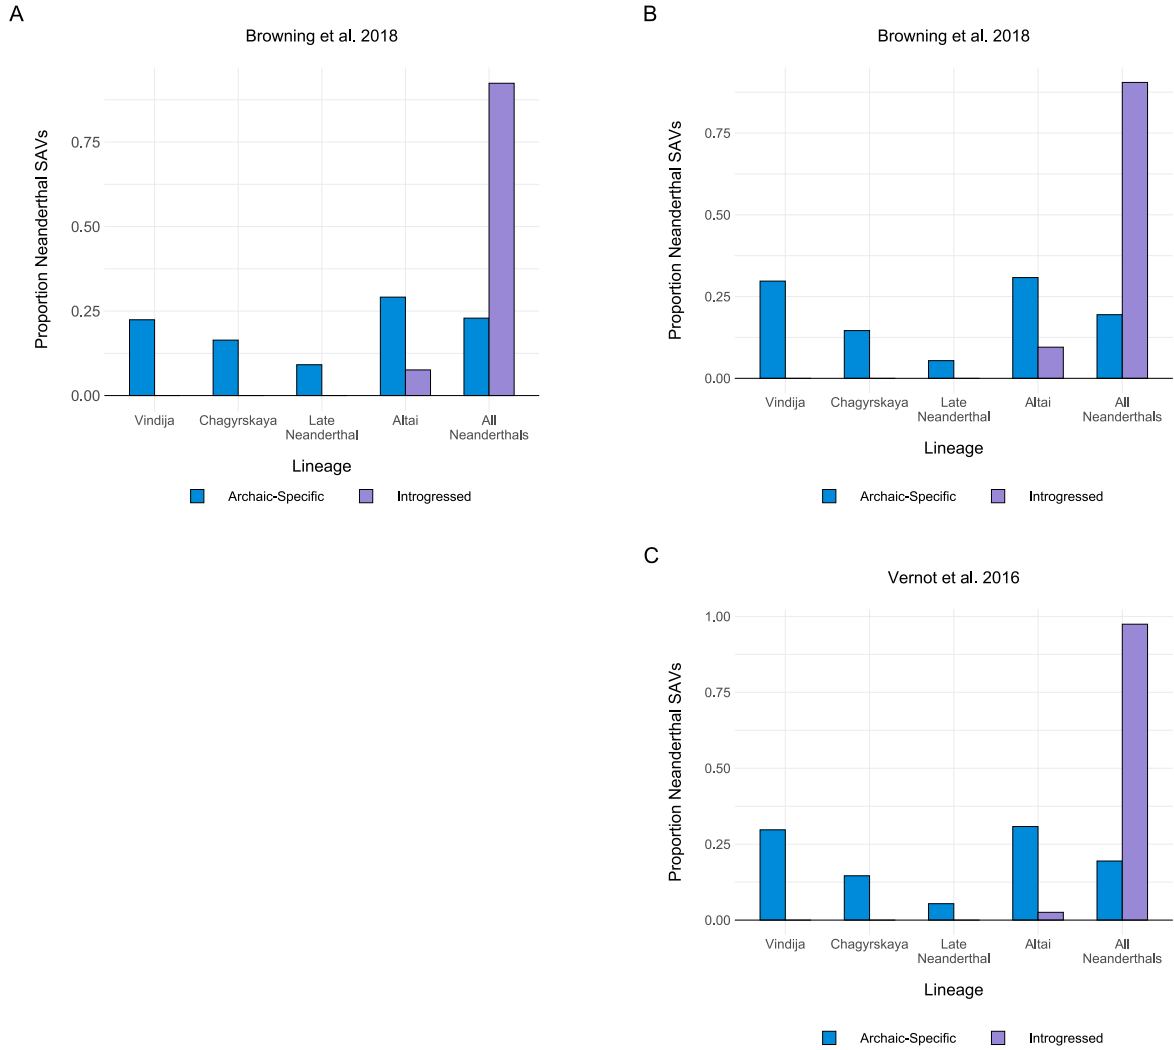

**Supplementary Fig. 10 | Introgressed SAVs are largely older variants.**

(A) Proportion of SAVs at  $\Delta \geq 0.2$  per Neanderthal lineage among archaic-specific SAVs (expected) and introgressed SAVs (observed) from [39]. Proportions were calculated from the sum of all Neanderthal lineages because power to detect introgressed Denisovan SAVs is low. All data are presented in **Supplementary Table 10**. (B) Proportion of SAVs at  $\Delta \geq 0.5$  using introgressed SAVs from [39]. (C) Proportion of SAVs at  $\Delta \geq 0.5$  using introgressed SAVs from [38].

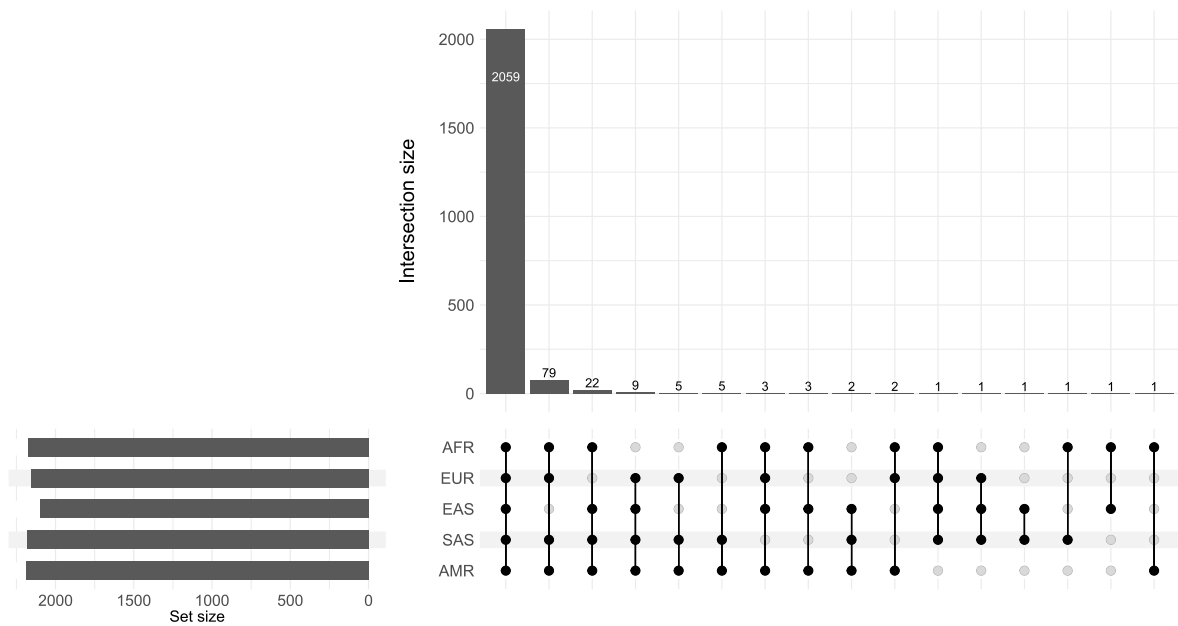

**Supplementary Fig. 11 | Most ancient SAVs occur in all 1KG superpopulations.** Unique and shared ancient SAVs per [39] at  $\Delta \geq 0.2$ . Allele frequencies are from 1KG. By definition, each ancient SAV was considered present in a population if the allele frequency was  $\geq 0.05$  for at least two superpopulations. AFR = African, AMR = American, EAS = East Asian, EUR = European, SAS = South Asian.

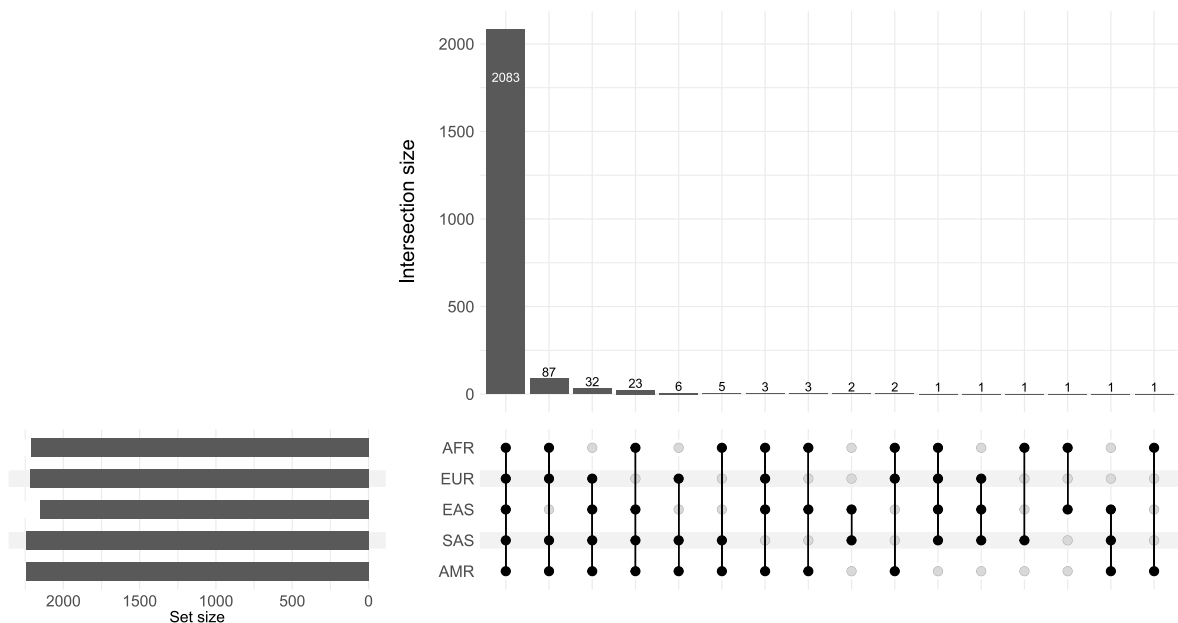

**Supplementary Fig. 12 | Most ancient SAVs occur in all 1KG superpopulations.** Unique and shared ancient SAVs per [38] at  $\Delta \geq 0.2$ . Allele frequencies are from 1KG. By definition, each ancient SAV was considered present in a population if the allele frequency was  $\geq 0.05$  for at least two superpopulations. AFR = African, AMR = American, EAS = East Asian, EUR = European, SAS = South Asian.

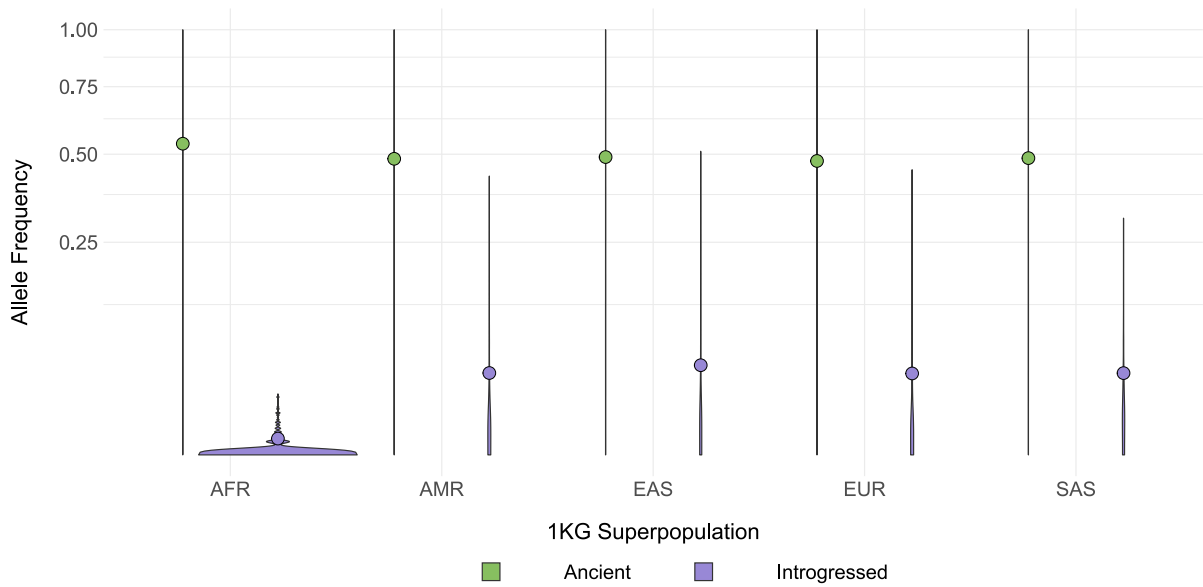

**Supplementary Fig. 13 | Ancient SAVs occur a moderate to high frequencies, whereas introgressed SAVs occur at lower frequencies.** Allele frequency distributions for SAVs present in both archaic and modern individuals stratified by 1KG superpopulation and origin (ancient vs. introgressed) per [39]. Ancient SAVs (n = 2,195) are colored green and displayed on the left, while introgressed SAVs (n = 377) are colored purple and displayed on the right per superpopulation. If the introgressed allele was the reference allele, we subtracted the 1KG allele frequency from 1. AFR = African, AMR = American, EAS = East Asian, EUR = European, SAS = South Asian. The colored dot represents the mean allele frequency. Note the y-axis is square root transformed.

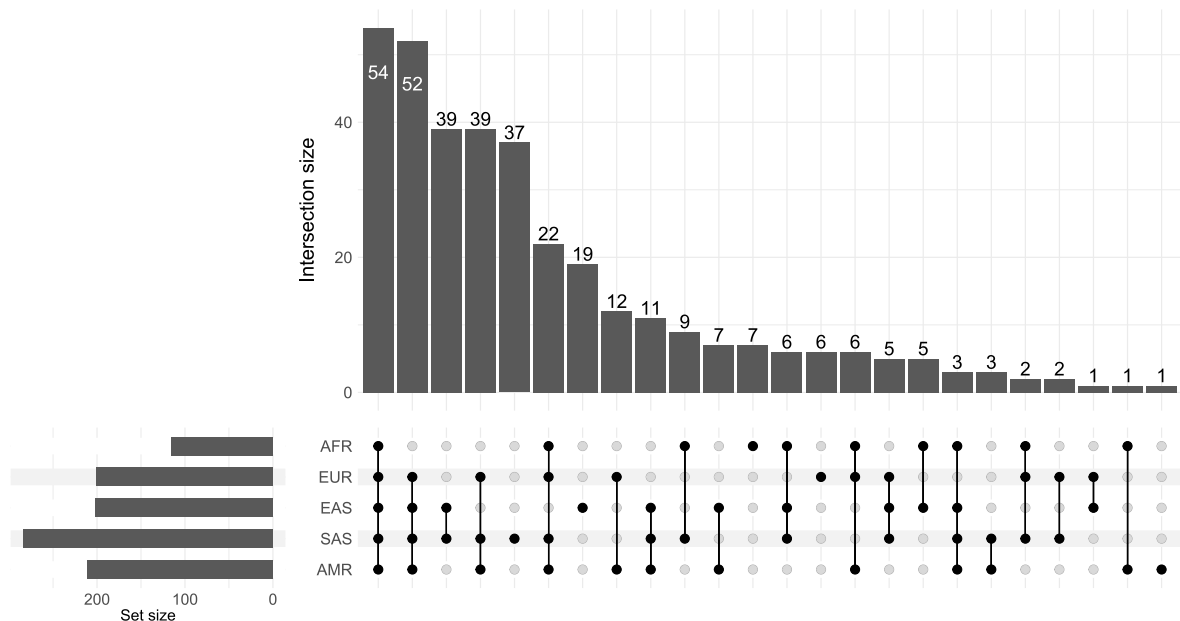

**Supplementary Fig. 14 | Many introgressed SAVs occur in multiple 1KG superpopulations.** Unique and shared introgressed SAVs per [39] at  $\Delta \geq 0.2$ . Allele frequencies are from 1KG. If the introgressed allele was the reference allele, we subtracted the 1KG allele frequency from 1. Each SAV was considered present in a population if the allele frequency was  $> 0.01$  (N = 349). The remaining 28 variants occurred at  $\leq 0.01$  allele frequency. AFR = African, AMR = American, EAS = East Asian, EUR = European, SAS = South Asian.

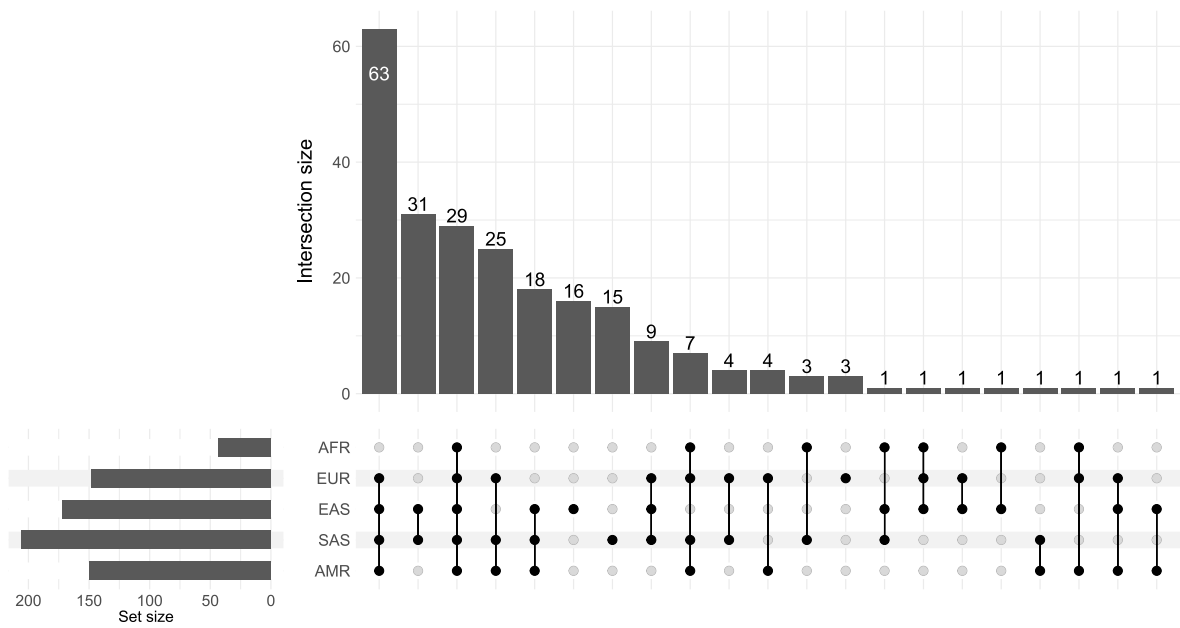

**Supplementary Fig. 15 | Many introgressed SAVs occur in multiple 1KG superpopulations.** Unique and shared introgressed SAVs per [38] at  $\Delta \geq 0.2$ . Allele frequencies are from the [38] metadata. Each SAV was considered present in a population if the allele frequency was  $> 0.01$  ( $N = 203$ ). The remaining 34 variants occurred at  $\leq 0.01$  allele frequency. AFR = African, AMR = American, EAS = East Asian, EUR = European, SAS = South Asian.

A

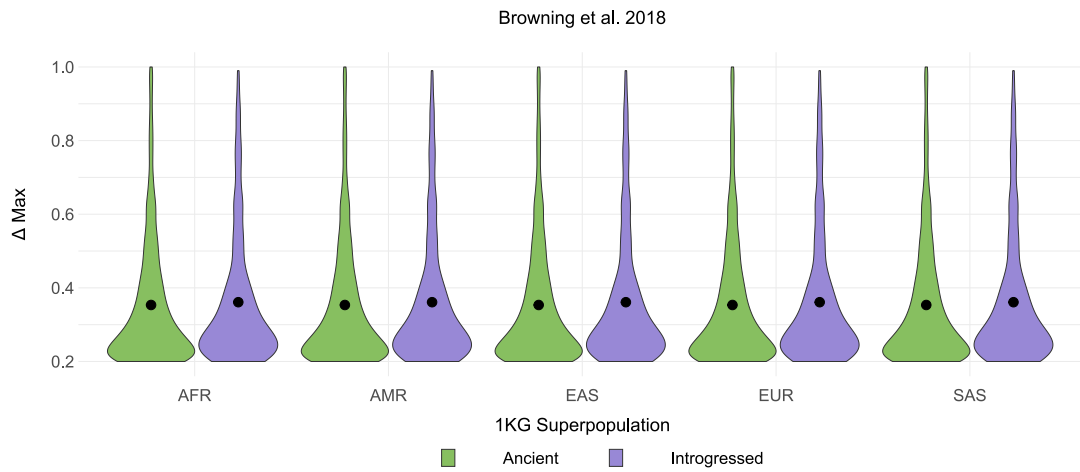

B

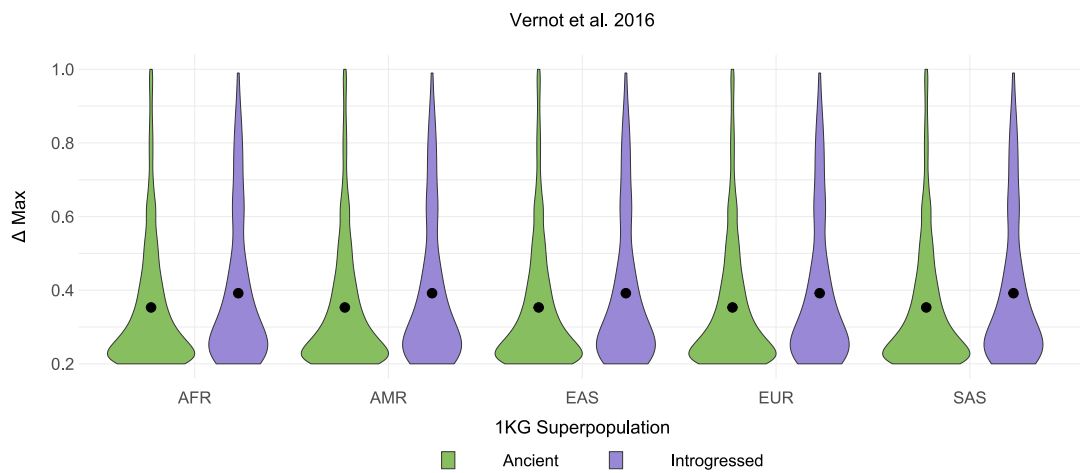

**Supplementary Fig. 16 |  $\Delta$  max does not differ between 1KG superpopulations.**

(A)  $\Delta$  max for SAVs by 1KG superpopulation and allele origin per [39]. AFR = African, AMR = American, EAS = East Asian, EUR = European, SAS = South Asian. (B)  $\Delta$  max for SAVs by 1KG superpopulation and allele origin per [38].



Browning et al. 2018

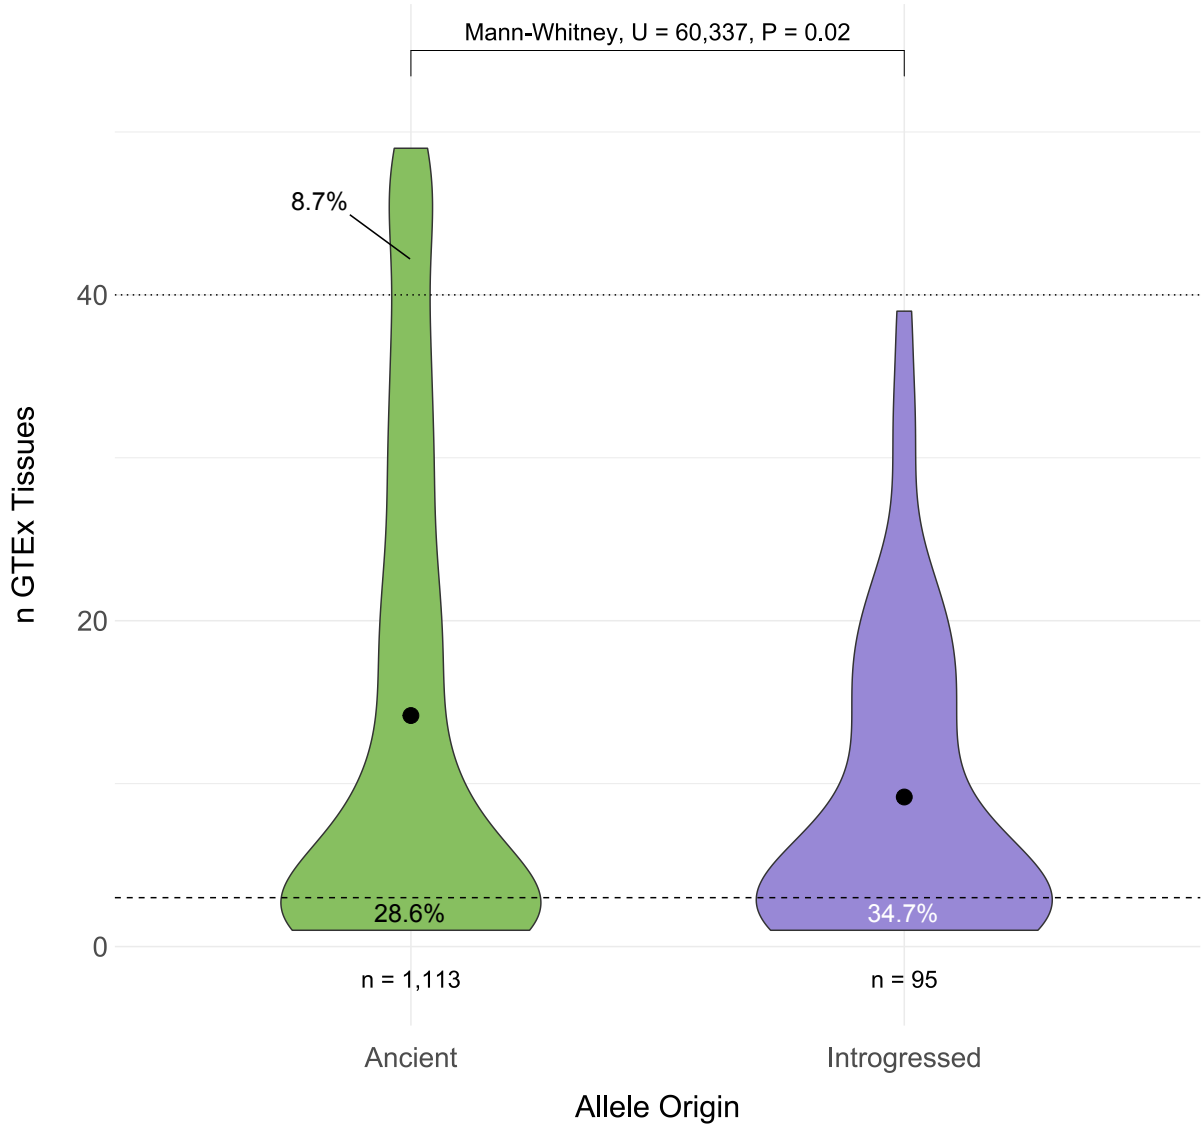

**Supplementary Fig. 17 | Introgressed sQTL SAVs are more tissue-specific than ancient variants.** The distribution of GTEx tissues in which an ancient or introgressed SAV per [39] was identified as an sQTL. We defined “tissue-specific” variants as those occurring in 1 or 2 tissues and “core” sQTLs as those occurring in > 40 of the 49 tissues. The dashed and dotted lines represent these definitions, respectively. The proportion of SAVs below and above these thresholds for both origins are annotated.

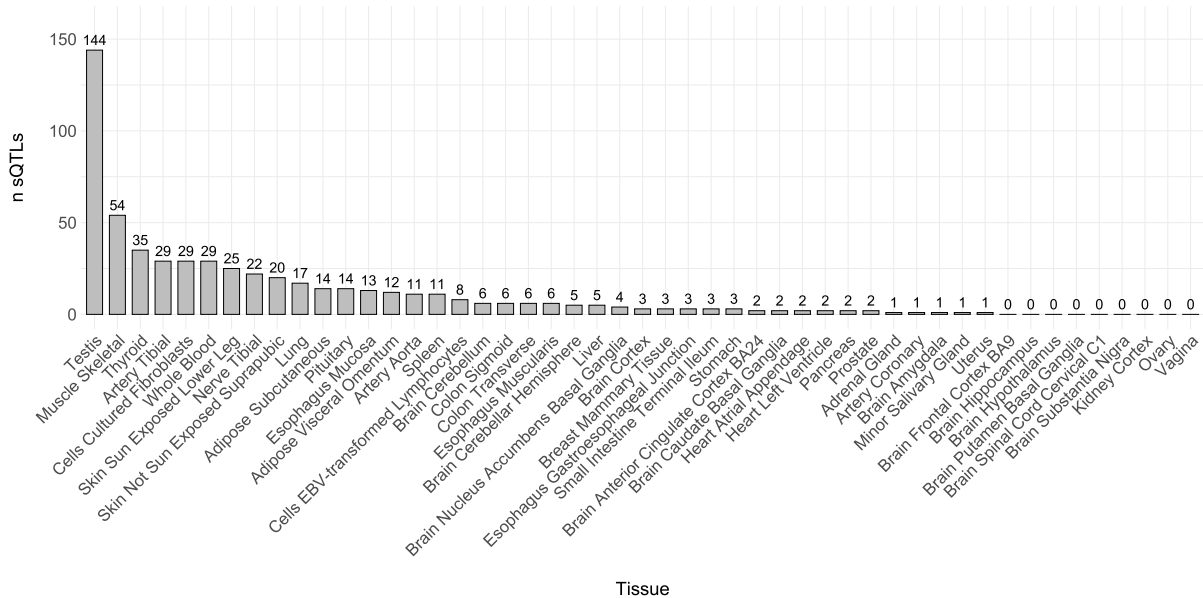

**Supplementary Fig. 18 | sQTL SAVs predominantly occur in testis, muscle skeletal, thyroid, tibial artery, fibroblasts, skin, and tibial nerve tissues.** The number of tissue-specific (n GTEx tissues = 1 or 2) sQTL SAVs per GTEx tissue.

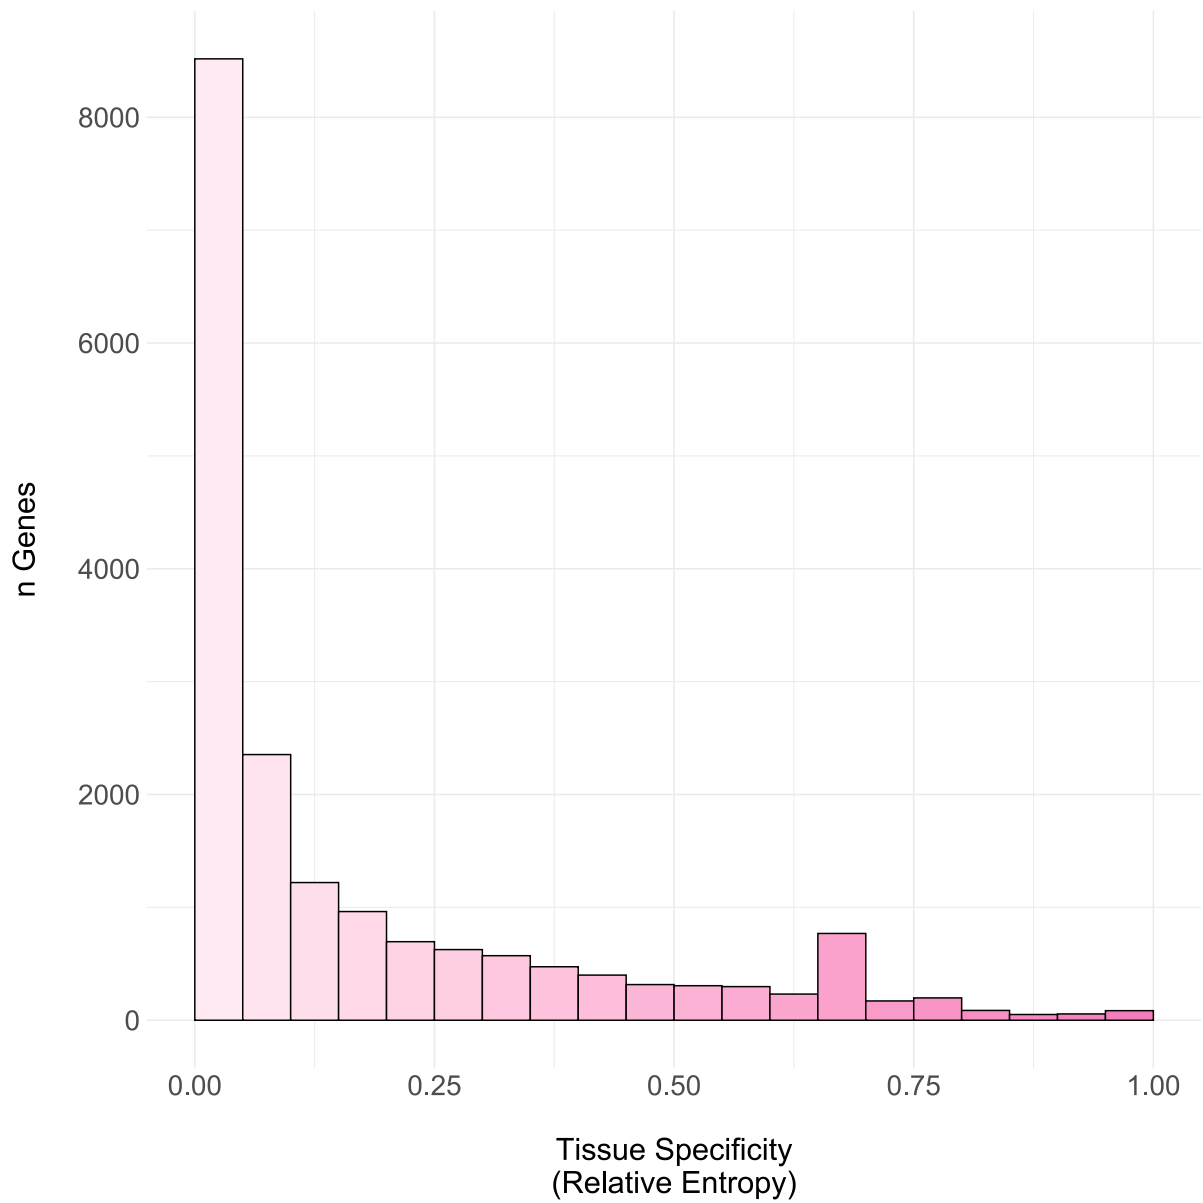

**Supplementary Fig. 19 | Most gene expression is not tissue-specific.** The distribution of relative entropy in 0.05 bins calculated from GTEx TPM counts across 34 tissues for 18,392 genes.

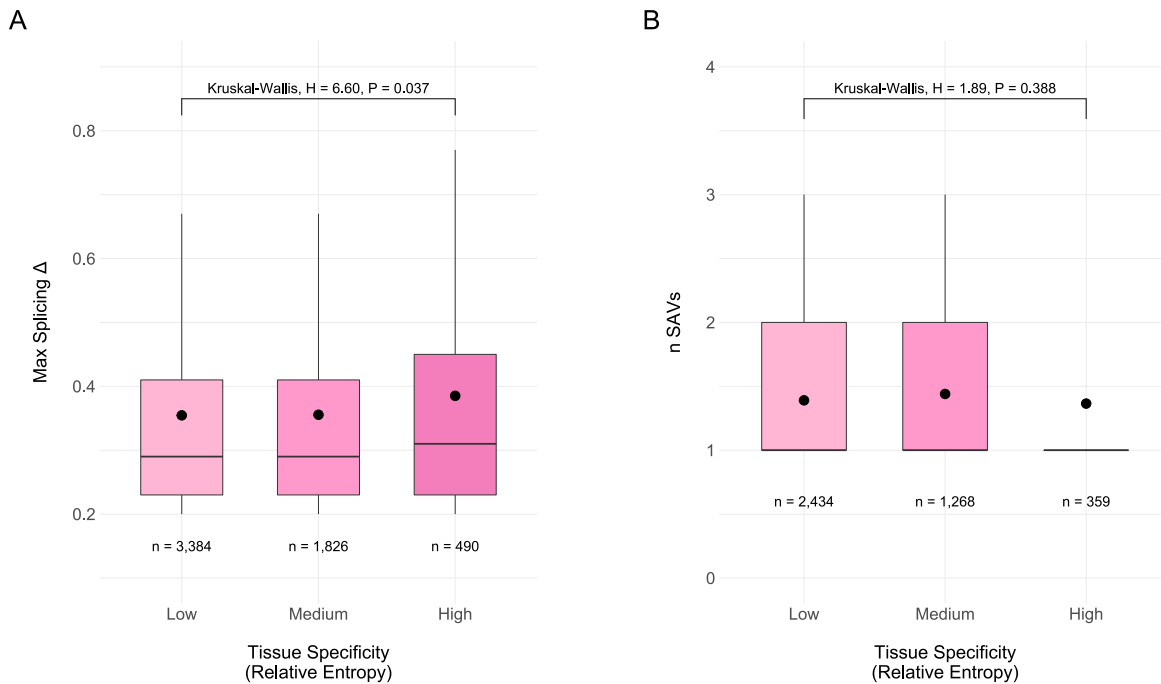

**Supplementary Fig. 20 | Maximum splicing probability, but not the number of SAVs, is related to tissue-specific gene expression.**

**(A)** The distributions of maximum splice altering probability ( $\Delta$ ) for SAVs in 4,061 genes binned by tissue-specificity of expression. We quantified the tissue-specificity of each gene as the relative entropy of expression levels across 34 tissues from GTEx compared to genes overall. Low tissue specificity reflects relative entropy  $\leq 0.1$ , medium tissue specificity reflects relative entropy  $> 0.1$  and  $\leq 0.5$ , and high tissue specificity reflects relative entropy  $> 0.5$ . **(Supplementary Fig. 19)** The boxplots display the median and IQR, with the upper whiskers extending to largest value  $\leq 1.5 \times$  IQR from the 75th percentile and the lower whiskers extending to the smallest values  $\leq 1.5 \times$  IQR from the 25th percentile. **(B)** The number of SAVs by binned gene expression calculated from GTEx TPM counts across 34 tissues. We analyzed a total of 4,061 genes with SAVs. Tissue specificity categories were created and data visualized as in **A**.

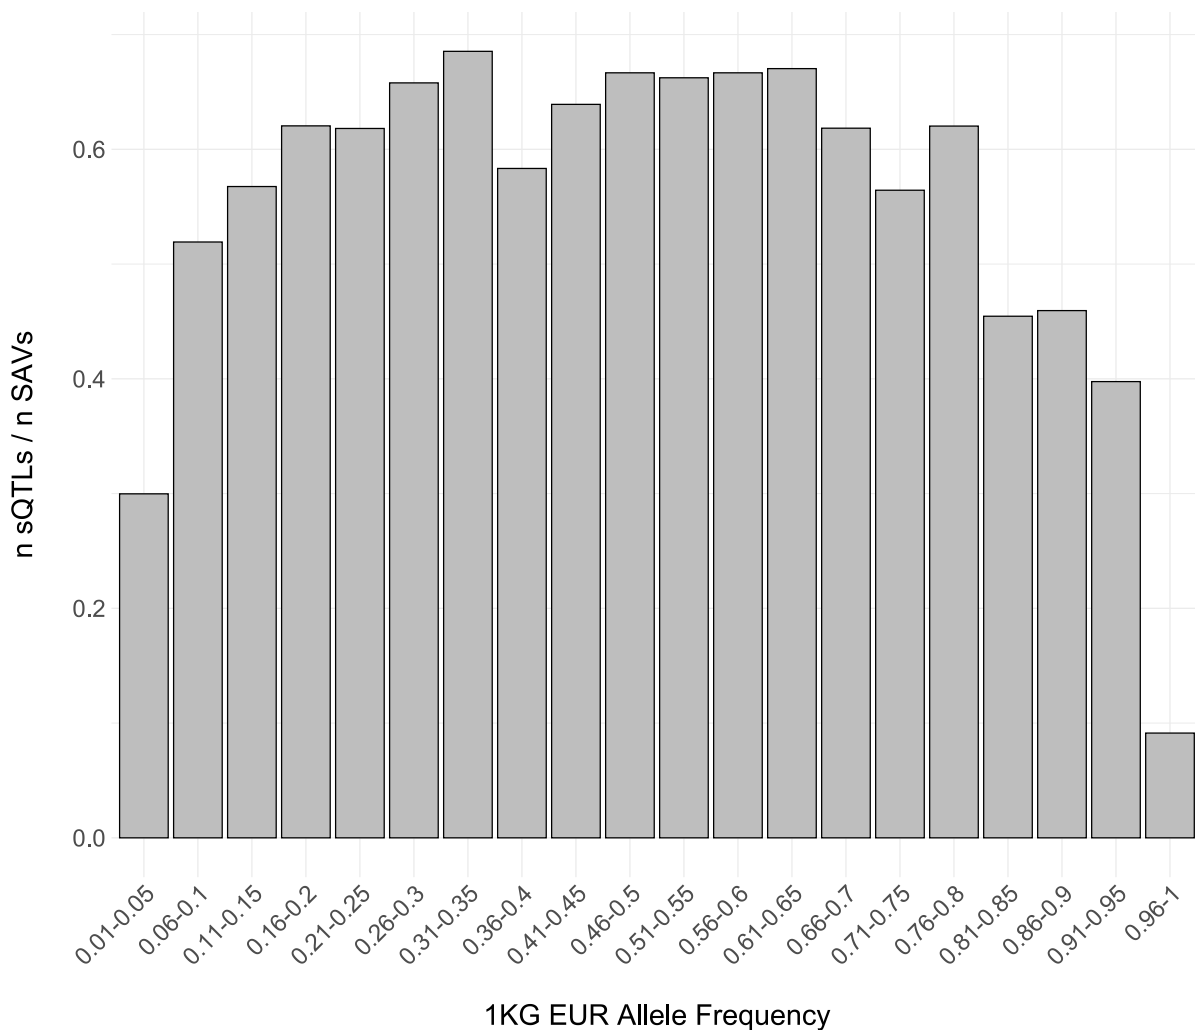

**Supplementary Fig. 21 | > 50% of SAVs are sQTLs.** The proportion of sQTLs also identified as SAVs per binned allele frequencies among 1KG European individuals. We used the precalculated frequencies provided in the 1KG VCFs for this analysis.

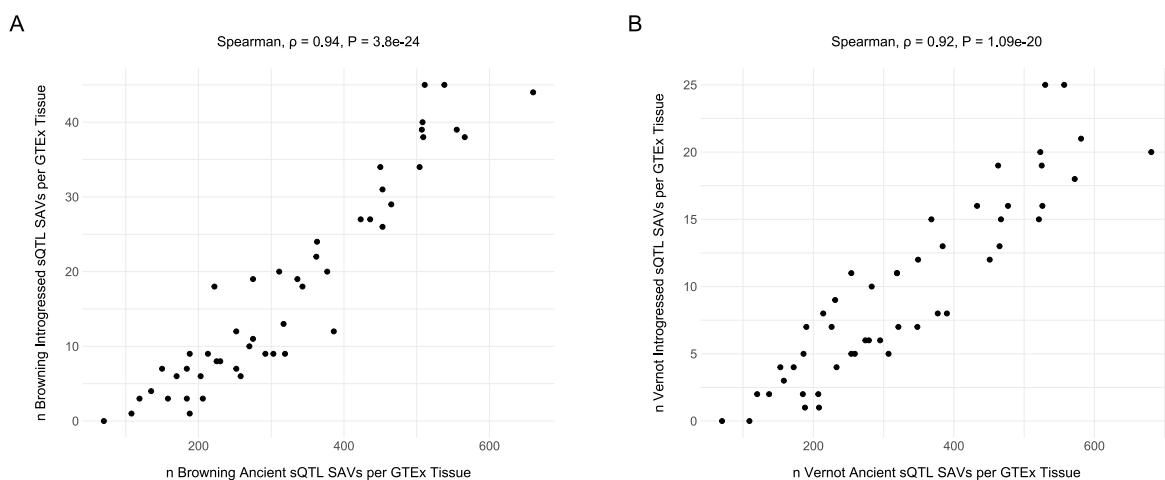

**Supplementary Fig. 22 | The number of ancient and introgressed sQTL SAVs are associated among GTEx tissues.**

(A) The number of [39] ancient vs. introgressed sQTL SAVs per tissue in GTEx. (B) The number of [38] ancient vs. introgressed sQTL SAVs per tissue in GTEx.

A

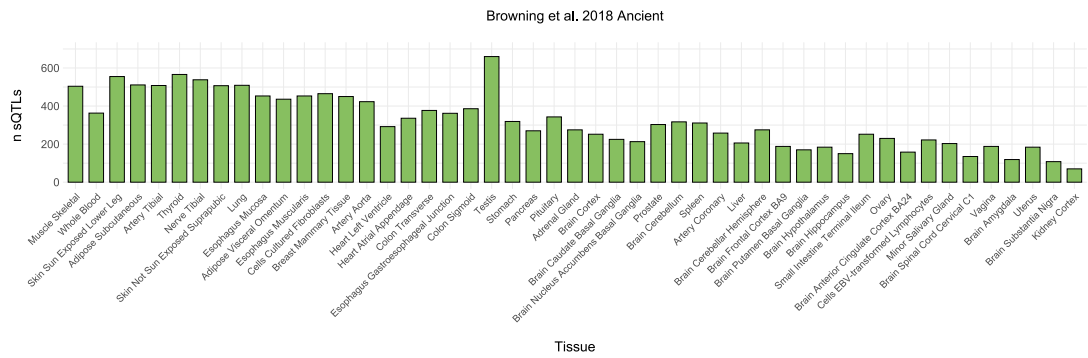

B

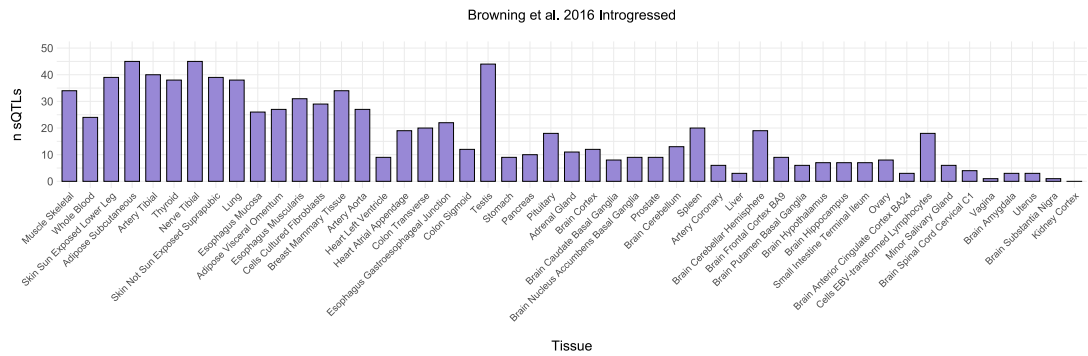

**Supplementary Fig. 23 | The number of Browning et al. 2018 sQTL SAVs is associated with GTEx sample size.**

(A) The number of sQTL SAVs per tissue among [39] ancient SAVs ordered by decreasing GTEx sample size. (B) The number of sQTL SAVs per tissue among [39] introgressed SAVs ordered by decreasing GTEx sample size.

A

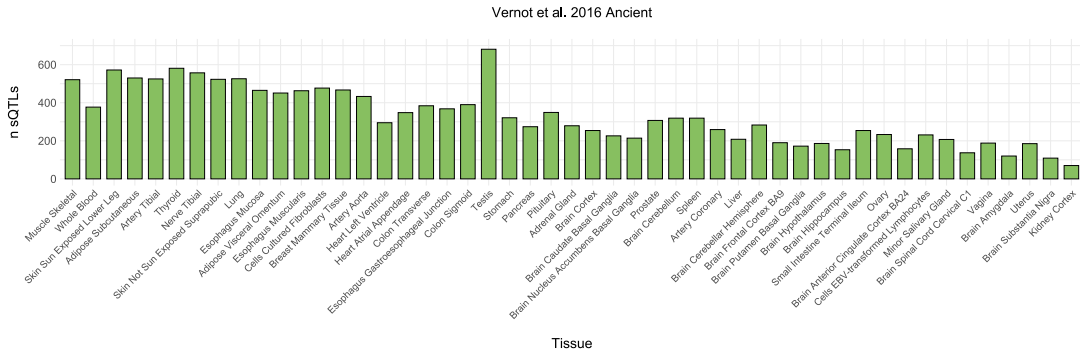

B

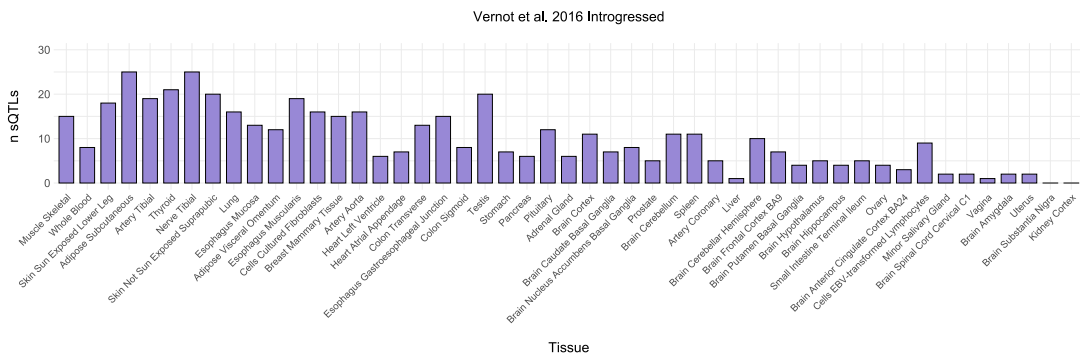

**Supplementary Fig. 24 | The number of Vernot et al. 2016 sQTL SAVs is associated with GTEx sample size.**

(A) The number of sQTL SAVs per tissue among [38] ancient SAVs ordered by decreasing GTEx sample size. (B) The number of sQTL SAVs per tissue among [38] introgressed SAVs ordered by decreasing GTEx sample size.

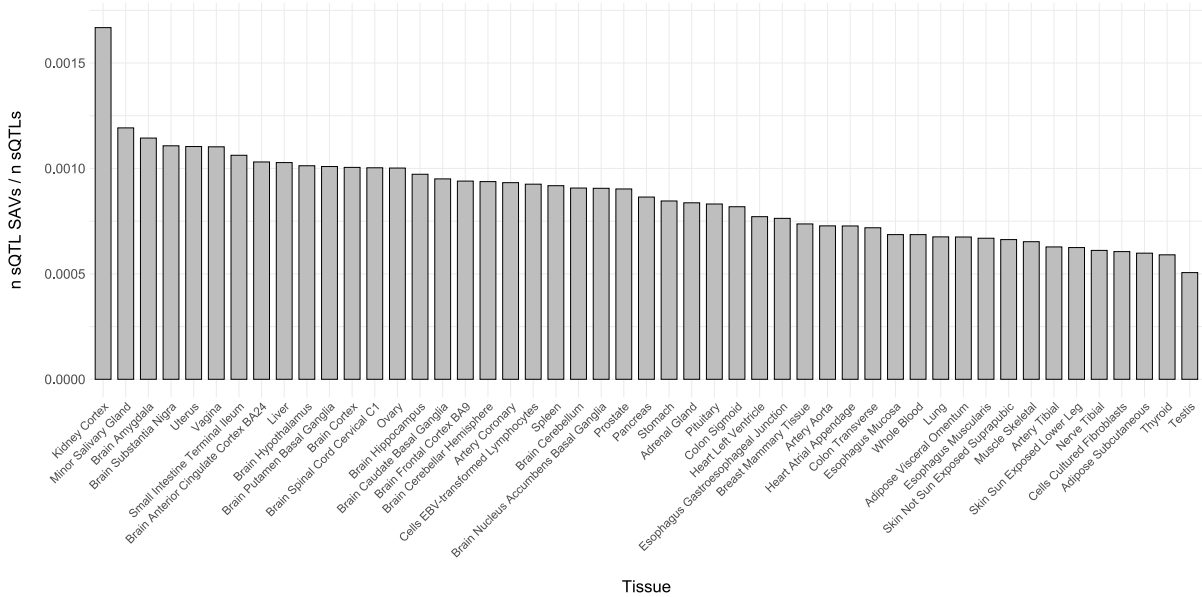

**Supplementary Fig. 25 | The proportion of sQTL SAVs is similar across tissues.** The proportion of sQTLs SAVs from all sQTLs per GTEx tissue, ordered by decreasing proportion.

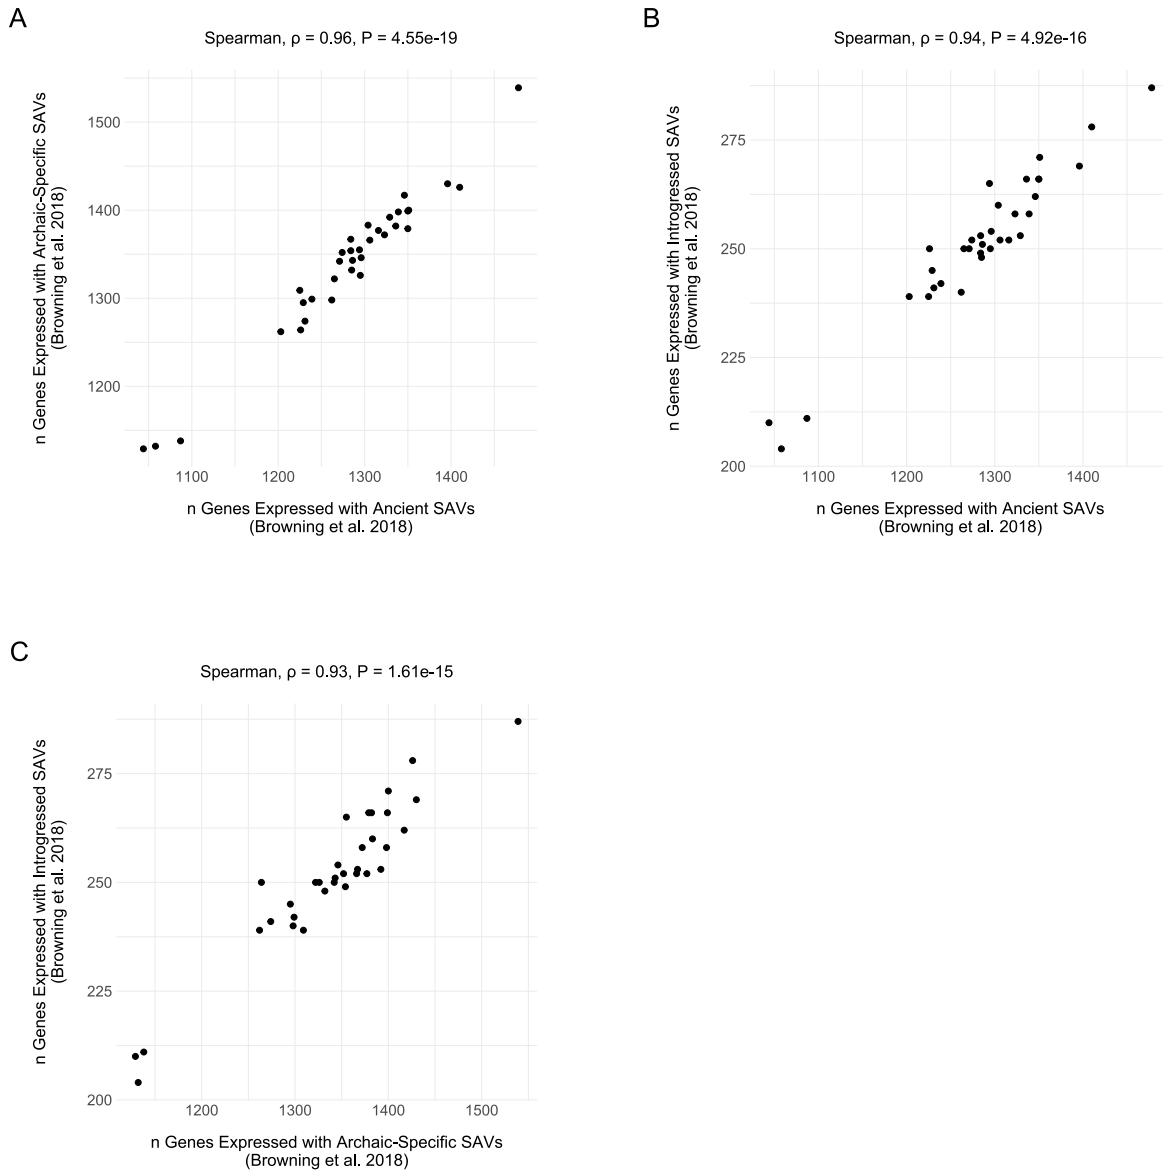

**Supplementary Fig. 26 | The number of genes expressed per tissue are similar across different [39] allele origins.**

(A) The number of genes with TPM > 1 containing at least one SAV for [39] ancient and archaic-specific SAVs. Each dot represents a GTEx tissue. (B) The number of genes with TPM > 1 containing at least one SAV for [39] ancient and introgressed SAVs. (C) The number of genes with TPM > 1 containing at least one SAV for [39] archaic-specific and introgressed SAVs.



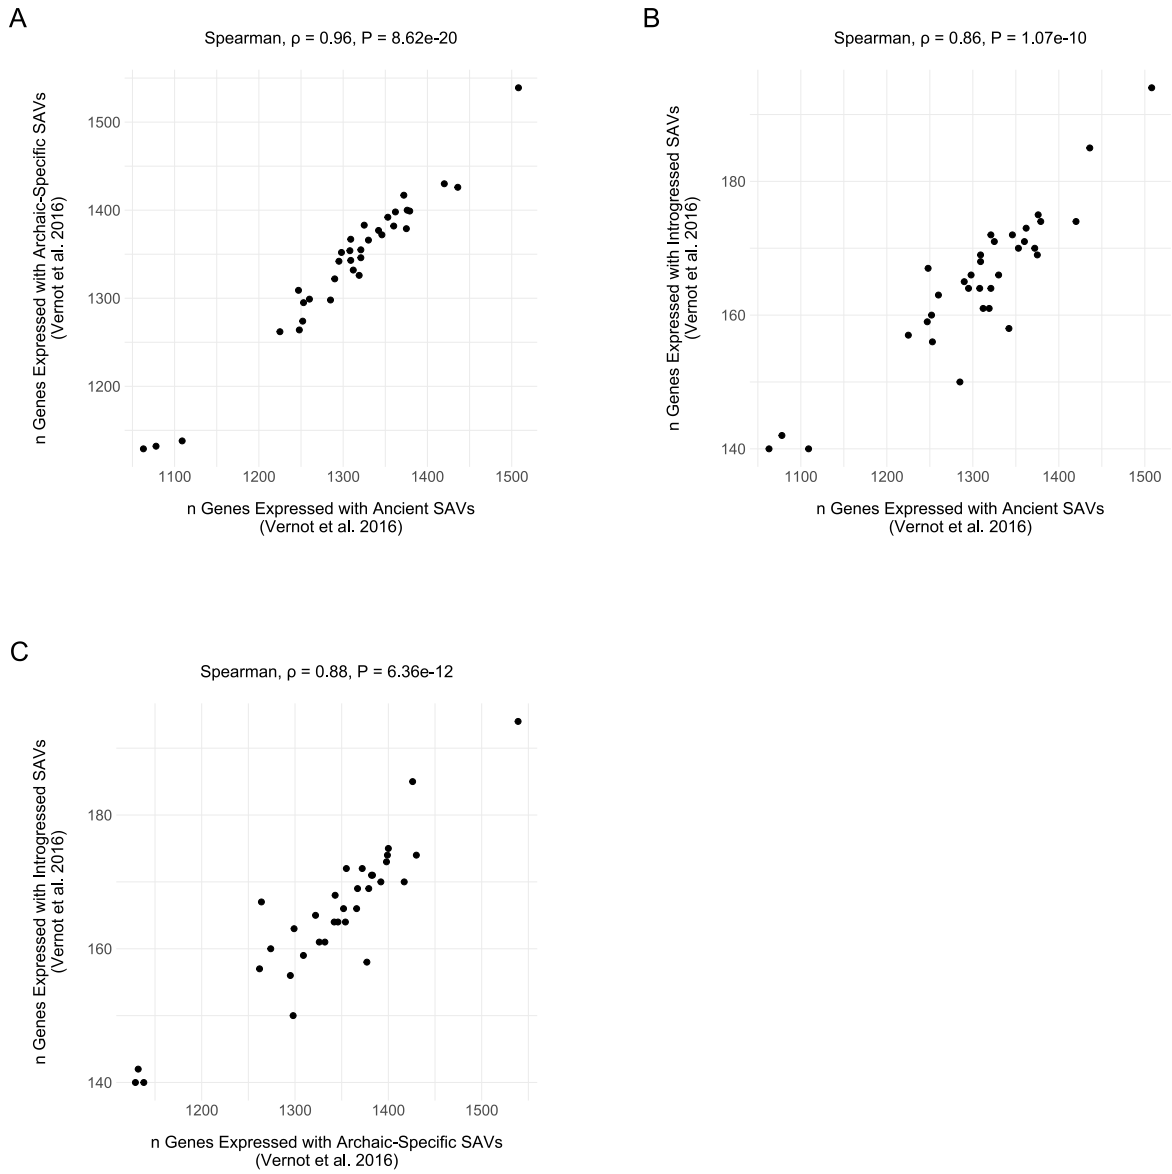

**Supplementary Fig. 27 | The number of genes expressed per tissue are similar across different [38] allele origins.**

(A) The number of genes with TPM > 1 containing at least one SAV for [38] ancient and archaic-specific SAVs. Each dot represents a GTEx tissue. (B) The number of genes with TPM > 1 containing at least one SAV for [38] ancient and introgressed SAVs. (C) The number of genes with TPM > 1 containing at least one SAV for [38] archaic-specific and introgressed SAVs.

### 5.3 Supplementary Tables

| n Non-Reference Alleles | n         |
|-------------------------|-----------|
| 1                       | 1,566,233 |
| 2                       | 1,660     |
| 3                       | 1         |

**Supplementary Table 1 | Distribution of non-reference alleles.** The number of variant positions with at least one non-reference allele among the archaics per number of non-reference alleles.

| n Annotations | n         |
|---------------|-----------|
| 1             | 1,537,451 |
| 2             | 30,448    |
| 3             | 1,154     |
| 4             | 75        |
| 5             | 36        |
| 6             | 15        |
| 7             | 25        |
| 8             | 22        |
| 9             | 36        |
| 10            | 20        |
| 11            | 20        |
| 12            | 15        |
| 13            | 58        |
| 14            | 70        |
| 15            | 34        |
| 16            | 6         |
| 17            | 6         |
| 18            | 32        |
| 19            | 6         |
| 20            | 3         |
| 21            | 24        |

**Supplementary Table 2 | Distribution of multiple annotations.** The number of variants with the given number of annotations from GENCODE, Human Release 24, for hg19/GRCH37.

| All Variants |        |         |         |         |
|--------------|--------|---------|---------|---------|
|              | ./.    | 0/0     | 1/0     | 1/1     |
| Altai        | 6,226  | 591,371 | 126,440 | 883,313 |
| Chagyrskaya  | 37,156 | 583,787 | 98,076  | 888,331 |
| Denisovan    | 21,574 | 546,792 | 139,774 | 899,210 |
| Vindija      | 29,672 | 570,175 | 119,918 | 887,585 |

---

| Variants with $\Delta$ Max $\geq$ 0.2 |     |       |     |       |
|---------------------------------------|-----|-------|-----|-------|
|                                       | ./. | 0/0   | 1/0 | 1/1   |
| Altai                                 | 18  | 2,227 | 538 | 3,167 |
| Chagyrskaya                           | 266 | 2,202 | 397 | 3,085 |
| Denisovan                             | 157 | 2,122 | 587 | 3,084 |
| Vindija                               | 163 | 2,160 | 496 | 3,131 |

---

| Variants with $\Delta$ Max $\geq$ 0.5 |     |     |     |     |
|---------------------------------------|-----|-----|-----|-----|
|                                       | ./. | 0/0 | 1/0 | 1/1 |
| Altai                                 | 4   | 386 | 101 | 558 |
| Chagyrskaya                           | 69  | 394 | 61  | 525 |
| Denisovan                             | 45  | 376 | 107 | 521 |
| Vindija                               | 35  | 361 | 108 | 545 |

**Supplementary Table 3 | Archaic genotype distribution.** The number of genotypes per individual for all variants and both delta thresholds. ./ = missing genotypes, 0/0 = homozygous for reference allele, 1/0 = heterozygote, 1/1 = homozygous for alternate allele.

| 1KG Superpopulation | 1KG Population | Sample Name | n SAVs |
|---------------------|----------------|-------------|--------|
| AFR                 | ESN            | HG00137     | 3,266  |
|                     | GWD            | HG00338     | 3,344  |
|                     | LWK            | HG00619     | 3,320  |
|                     | MSL            | HG01198     | 3,514  |
|                     | YRI            | HG01281     | 3,493  |
| AMR                 | CLM            | HG01524     | 3,363  |
|                     | MXL            | HG01802     | 3,363  |
|                     | PEL            | HG02142     | 3,349  |
|                     | PUR            | HG02345     | 3,385  |
| EAS                 | CDX            | HG02629     | 4,120  |
|                     | CHB            | HG03060     | 4,160  |
|                     | CHS            | HG03190     | 4,142  |
|                     | JPT            | HG03708     | 3,368  |
|                     | KHV            | HG03711     | 3,379  |
| EUR                 | CEU            | HG03800     | 3,435  |
|                     | FIN            | HG04014     | 3,421  |
|                     | GBR            | NA11830     | 3,200  |
|                     | GIH            | NA18552     | 3,382  |
|                     | IBS            | NA18868     | 4,102  |
|                     | TSI            | NA19011     | 3,321  |
| SAS                 | BEB            | NA19452     | 4,078  |
|                     | ITU            | NA19741     | 3,284  |
|                     | PJL            | NA20537     | 3,168  |
|                     | STU            | NA21141     | 3,487  |

**Supplementary Table 4 | The average number of SAVs per randomly sampled individual in 1KG.** We randomly sampled one individual per 1KG population and ran SpliceAI on their combined variants. There were 4,582,422 total SpliceAI annotated variants among autosomal SNVs and 14,006 variants with a  $\Delta \max \geq 0.2$ . These N SAVs reported here include any site where an individual had at least one alternate allele present (i.e., heterozygotes and homozygotes for the alternate allele). Superpopulation and population labels follow 1KG convention.

| n SAVs | n Genes | Genes                                               |
|--------|---------|-----------------------------------------------------|
| 1      | 3,111   |                                                     |
| 2      | 769     |                                                     |
| 3      | 246     |                                                     |
| 4      | 71      |                                                     |
| 5      | 19      |                                                     |
| 6      | 14      |                                                     |
| 7      | 6       | <i>CDH13, CDH23, CSMD1, DNAH17, HLA-DPA1, LAMA5</i> |
| 8      | 1       | <i>ADARB2</i>                                       |
| 9      | 2       | <i>SDK1, WWOX</i>                                   |
| 10     | 1       | <i>HLA-DPB1</i>                                     |
| 11     | 2       | <i>CNTNAP2, SSPO</i>                                |

**Supplementary Table 5 | Distribution of SAVs per gene.** The distribution of SAVs per gene with the specific genes listed for those with  $\geq 7$  SAVs.

| $\Delta$ | Gene Characteristic | $\rho$ | P Value                   |
|----------|---------------------|--------|---------------------------|
| 0.2      | N Exons             | 0.3161 | $< 2.23 \times 10^{-308}$ |
|          | CDS/Exon Length     | 0.1851 | $1.07 \times 10^{-135}$   |
|          | Gene Length         | 0.2920 | $< 2.23 \times 10^{-308}$ |
|          | N Isoforms          | 0.1767 | $1.87 \times 10^{-113}$   |
| 0.5      | N Exons             | 0.1330 | $2.20 \times 10^{-70}$    |
|          | CDS/Exon Length     | 0.0625 | $1.01 \times 10^{-16}$    |
|          | Gene Length         | 0.1017 | $8.99 \times 10^{-42}$    |
|          | N Isoforms          | 0.0769 | $1.24 \times 10^{-22}$    |

**Supplementary Table 6 | Physical gene characteristic associations with the number of SAVs per gene.** Spearman correlation between four variables: 1) the number of exons, 2) length of coding sequence in bp, 3) gene body length in bp, 4) the number of isoforms and the N SAVs per gene for both  $\Delta$  thresholds.

| Protein Effect          | All   | Vernot et al. 2016 |                  |              |                        | Browning et al. 2018 |                  |              |                        |
|-------------------------|-------|--------------------|------------------|--------------|------------------------|----------------------|------------------|--------------|------------------------|
|                         |       | Ancient            | Archaic-Specific | Introgressed | Low-Confidence Ancient | Ancient              | Archaic-Specific | Introgressed | Low-Confidence Ancient |
| No effect               | 2,391 | 1,092              | 729              | 69           | 501                    | 1,061                | 729              | 148          | 453                    |
| Longer protein w/ PTCs  | 1,897 | 634                | 753              | 91           | 419                    | 620                  | 753              | 133          | 391                    |
| Longer protein w/o PTCs | 333   | 95                 | 153              | 14           | 71                     | 90                   | 153              | 25           | 65                     |
| Longer UTR              | 479   | 151                | 206              | 26           | 96                     | 149                  | 206              | 25           | 99                     |
| Single missense         | 396   | 142                | 137              | 21           | 96                     | 139                  | 137              | 28           | 92                     |
| Truncated protein       | 332   | 93                 | 155              | 18           | 66                     | 93                   | 155              | 18           | 66                     |
| Truncated UTR           | 116   | 44                 | 48               | 5            | 19                     | 42                   | 48               | 9            | 17                     |
| Unknown                 | 6     | 1                  | 5                | 0            | 0                      | 1                    | 5                | 0            | 0                      |

**Supplementary Table 7 | SAV effects on resulting protein.** The number of SAVs per effect on the resulting transcript and protein. PTC = premature termination codon, UTR = 5' or 3' untranslated region.

| Delta | n Unique SAVs | n Unique Non SAVs | n Shared SAVs | n Shared Non SAVs | OR    | 95% CI Lower Bound | 95% CI Upper Bound | P Value | Bonferroni |
|-------|---------------|-------------------|---------------|-------------------|-------|--------------------|--------------------|---------|------------|
| 0.2   | 2,416         | 615,666           | 1,933         | 571,264           | 1.160 | 1.092              | 1.231              | 0.000   | Y          |
| 0.3   | 1,175         | 616,907           | 945           | 572,252           | 1.153 | 1.059              | 1.257              | 0.001   | Y          |
| 0.4   | 685           | 617,397           | 533           | 572,664           | 1.192 | 1.064              | 1.335              | 0.002   | Y          |
| 0.5   | 437           | 617,645           | 328           | 572,869           | 1.236 | 1.071              | 1.426              | 0.004   | Y          |

**Supplementary Table 8 | Enrichment tests for the sum of lineage-specific SAVs at different  $\Delta$ s.** Input data for Fisher's exact tests. OR = odds ratio; 95% CI Lower Bound and 95% CI Upper Bound = the lower and upper bounds of the 95% confidence interval, respectively; P Value = unadjusted p-value.

| △   | Distribution | n Unique SAVs | n Unique Non SAVs | n Shared SAVs | n Shared Non SAVs | OR    | 95% CI Lower Bound | 95% CI Upper Bound | P Value | Bonferroni |
|-----|--------------|---------------|-------------------|---------------|-------------------|-------|--------------------|--------------------|---------|------------|
|     | Altai        | 399           | 81,517            | 1,933         | 571,264           | 1.447 | 1.298              | 1.612              | 0.000   | Y          |
|     | Chagyrskaya  | 218           | 53,457            | 1,933         | 571,264           | 1.205 | 1.047              | 1.386              | 0.011   | Y          |
| 0.2 | Denisovan    | 1,492         | 410,000           | 1,933         | 571,264           | 1.075 | 1.005              | 1.151              | 0.036   | N          |
|     | Vindija      | 307           | 70,692            | 1,933         | 571,264           | 1.283 | 1.138              | 1.448              | 0.000   | Y          |
|     | Total        | 2,416         | 615,666           | 1,933         | 571,264           | 1.160 | 1.092              | 1.231              | 0.000   | NA         |
|     | Altai        | 75            | 81,841            | 328           | 572,869           | 1.601 | 1.245              | 2.057              | 0.000   | Y          |
|     | Chagyrskaya  | 35            | 53,640            | 328           | 572,869           | 1.140 | 0.804              | 1.615              | 0.452   | N          |
| 0.5 | Denisovan    | 254           | 411,238           | 328           | 572,869           | 1.079 | 0.916              | 1.271              | 0.377   | N          |
|     | Vindija      | 73            | 70,926            | 328           | 572,869           | 1.798 | 1.395              | 2.317              | 0.000   | Y          |
|     | Total        | 437           | 617,645           | 328           | 572,869           | 1.236 | 1.071              | 1.426              | 0.004   | NA         |

**Supplementary Table 9 | Enrichment tests for lineage-specific SAVs.** Input data for Fisher's exact tests. OR = odds ratio; 95% CI Lower Bound and 95% CI Upper Bound = the lower and upper bounds of the 95% confidence interval, respectively; P Value = unadjusted p-value.

| $\Delta$         | $\geq 0.2$              |                              |                            |                         |                              |                            | $\geq 0.5$              |                              |                            |                         |                              |                            |
|------------------|-------------------------|------------------------------|----------------------------|-------------------------|------------------------------|----------------------------|-------------------------|------------------------------|----------------------------|-------------------------|------------------------------|----------------------------|
|                  | Archaic-Specific n SAVs | Browning Introgressed n SAVs | Vernot Introgressed n SAVs | Archaic-Specific n SAVs | Browning Introgressed n SAVs | Vernot Introgressed n SAVs | Archaic-Specific n SAVs | Browning Introgressed n SAVs | Vernot Introgressed n SAVs | Archaic-Specific n SAVs | Browning Introgressed n SAVs | Vernot Introgressed n SAVs |
| Altai            | 300                     | 17                           | 0                          | 7                       | 57                           | 4                          | 1                       |                              |                            |                         |                              |                            |
| Chagyrskaya      | 169                     | 0                            | 0                          | 0                       | 27                           | 0                          | 0                       |                              |                            |                         |                              |                            |
| Denisovan        | 916                     | 2                            | 2                          | 5                       | 165                          | 2                          | 1                       |                              |                            |                         |                              |                            |
| Late Neanderthal | 94                      | 0                            | 0                          | 0                       | 10                           | 0                          | 0                       |                              |                            |                         |                              |                            |
| Neanderthal      | 236                     | 207                          | 143                        | 143                     | 36                           | 38                         | 38                      |                              |                            |                         |                              |                            |
| Other            | 128                     | 38                           | 21                         | 21                      | 27                           | 4                          | 5                       |                              |                            |                         |                              |                            |
| Shared           | 112                     | 122                          | 68                         | 68                      | 27                           | 23                         | 14                      |                              |                            |                         |                              |                            |
| Vindija          | 231                     | 0                            | 0                          | 0                       | 55                           | 0                          | 0                       |                              |                            |                         |                              |                            |

**Supplementary Table 10 | Distribution of archaic-specific and introgressed SAVs.** The number of SAVs for both  $\Delta$  thresholds among archaic-specific and introgressed SAVs per [39] and [38]. Other denotes any combination of archaics not already listed.



| Chromosome | Position    | Reference Allele | Alternate Allele | Delta Max | Browning Allele Origin | Vernot Allele Origin   | Annotation   |
|------------|-------------|------------------|------------------|-----------|------------------------|------------------------|--------------|
| chr1       | 22,174,518  | G                | T                | 0.98      | introgressed           | introgressed           | HSPG2        |
| chr1       | 55,537,474  | C                | G                | 0.33      | low-confidence ancient | introgressed           | USP24        |
| chr1       | 161,681,848 | C                | T                | 0.20      | introgressed           | introgressed           | FCRLA        |
| chr1       | 212,985,592 | G                | A                | 0.52      | introgressed           | introgressed           | TATDN3       |
| chr11      | 86,159,859  | G                | A                | 0.26      | ancient                | introgressed           | ME3          |
| chr12      | 133,272,470 | G                | T                | 0.26      | introgressed           | introgressed           | PXMP2        |
| chr12      | 133,272,470 | G                | T                | 0.26      | introgressed           | introgressed           | RP13-672B3.2 |
| chr15      | 85,403,496  | G                | A                | 0.33      | introgressed           | introgressed           | ALPK3        |
| chr16      | 88,924,425  | C                | G                | 0.41      | introgressed           | introgressed           | TRAPPC2L     |
| chr19      | 40,913,595  | G                | A                | 0.23      | introgressed           | low-confidence ancient | PRX          |
| chr22      | 50,684,852  | G                | C                | 0.25      | introgressed           | introgressed           | HDAC10       |
| chr4       | 170,990,750 | G                | A                | 0.22      | introgressed           | introgressed           | AADAT        |
| chr5       | 6,753,013   | C                | T                | 0.24      | introgressed           | introgressed           | PAPD7        |
| chr5       | 167,919,825 | G                | A                | 0.38      | introgressed           | introgressed           | RARS         |
| chr6       | 33,264,115  | A                | C                | 0.34      | low-confidence ancient | introgressed           | RGL2         |
| chr8       | 130,763,783 | C                | T                | 0.87      | introgressed           | introgressed           | GSDMC        |

**Supplementary Table 11 | SAVs that exhibit allele-specific expression in modern humans.** 16 SAVs from our dataset that matched variants from [59].

| Distribution     | n sQTLs |
|------------------|---------|
| Altai            | 2       |
| Chagyrskaya      | 3       |
| Denisovan        | 8       |
| Late Neanderthal | 2       |
| Neanderthal      | 9       |
| Other            | 14      |
| Shared           | 74      |

**Supplementary Table 12 | Core sQTL SAV distribution among the archaics.** The distribution of core sQTL SAVs (n = 1,145) among the archaics. Core sQTLs were defined as those variants detected in > 40 tissues. All the variants represented here are either low or high-confidence ancient.

| Chromosome  | Position           | Reference Allele | Alternate Allele | Delta Max Alternate Allele | Delta Max Reference as Alternate |
|-------------|--------------------|------------------|------------------|----------------------------|----------------------------------|
| chr1        | 52,820,680         | C                | T                | 0.23                       | 0.23                             |
| chr1        | 152,944,501        | A                | T                | 0.23                       | 0.23                             |
| chr1        | 183,750,131        | C                | A                | 0.26                       | 0.26                             |
| <b>chr1</b> | <b>216,945,756</b> | <b>C</b>         | <b>A</b>         | <b>0.20</b>                | <b>0.19</b>                      |
| chr10       | 17,373,518         | T                | C                | 0.22                       | 0.22                             |
| chr11       | 84,191,111         | T                | C                | 0.40                       | 0.40                             |
| chr11       | 99,345,359         | C                | G                | 0.67                       | 0.67                             |
| chr17       | 14,109,360         | T                | G                | 0.20                       | 0.21                             |
| chr18       | 60,003,587         | G                | A                | 0.31                       | 0.30                             |
| chr19       | 33,410,289         | T                | C                | 0.71                       | 0.71                             |
| chr20       | 62,224,595         | G                | A                | 0.41                       | 0.41                             |
| chr3        | 52,486,376         | T                | C                | 0.34                       | 0.35                             |
| chr4        | 38,805,942         | G                | C                | 0.38                       | 0.37                             |
| chr4        | 100,460,531        | A                | G                | 0.35                       | 0.35                             |
| chr4        | 135,122,662        | G                | A                | 0.80                       | 0.80                             |
| chr5        | 118,669,326        | G                | C                | 0.22                       | 0.22                             |
| chr5        | 126,989,007        | A                | G                | 0.91                       | 0.91                             |
| chr5        | 148,430,560        | A                | C                | 0.32                       | 0.32                             |
| chr6        | 51,889,358         | T                | C                | 0.42                       | 0.42                             |
| chr6        | 52,138,226         | C                | G                | 0.21                       | 0.21                             |
| chr7        | 119,524,266        | C                | T                | 0.30                       | 0.30                             |
| chr7        | 126,797,408        | T                | A                | 0.43                       | 0.43                             |
| chr7        | 140,801,296        | T                | C                | 0.25                       | 0.25                             |
| chr7        | 140,958,656        | A                | G                | 0.26                       | 0.26                             |
| <b>chr7</b> | <b>157,177,273</b> | <b>C</b>         | <b>T</b>         | <b>0.31</b>                | <b>0.16</b>                      |
| chr7        | 158,543,832        | C                | A                | 0.21                       | 0.22                             |

**Supplementary Table 13 | Maximum  $\Delta$  for SAVs with an introgressed reference allele.**  $\Delta$  maximum for 26 SAVs whose reference allele rather than the alternate allele matched an introgressed tag SNP from [38]. We switched the reference and alternate alleles for these (and non-SAV) loci and reran SpliceAI. Delta Max Alternate Allele = the originally predicted  $\Delta$  where the reference allele is introgressed, Delta Max Reference as Alternate = the  $\Delta$  when the reference and alternate alleles are switched. Bolded variants are those whose values did not pass the SAP threshold after switching alleles.

| 1KG Superpopulation | 1KG Population | Sample      | n Transcripts | n Variants | n Variants PolyPhen | n Variants SIFT | n Variants Both |
|---------------------|----------------|-------------|---------------|------------|---------------------|-----------------|-----------------|
|                     |                | Altai       | 34            | 19         | 2                   | 5               | 2               |
|                     |                | Chagyrskaya | 27            | 15         | 1                   | 2               | 0               |
|                     |                | Denisovan   | 43            | 25         | 2                   | 5               | 0               |
|                     |                | Vindija     | 24            | 14         | 1                   | 1               | 0               |
| AFR                 | ESN            | HG00137     | 71            | 23         | 3                   | 5               | 2               |
|                     | GWD            | HG00338     | 57            | 23         | 1                   | 3               | 1               |
|                     | LWK            | HG00619     | 68            | 27         | 2                   | 2               | 1               |
|                     | MSL            | HG01198     | 67            | 28         | 2                   | 6               | 1               |
|                     | YRI            | HG01281     | 56            | 22         | 2                   | 2               | 1               |
| AMR                 | CLM            | HG01524     | 69            | 31         | 3                   | 7               | 3               |
|                     | MXL            | HG01802     | 42            | 21         | 0                   | 3               | 0               |
|                     | PEL            | HG02142     | 49            | 19         | 0                   | 1               | 0               |
|                     | PUR            | HG02345     | 43            | 22         | 0                   | 3               | 0               |
| EAS                 | CDX            | HG02629     | 70            | 26         | 1                   | 6               | 1               |
|                     | CHB            | HG03060     | 59            | 23         | 1                   | 6               | 0               |
|                     | CHS            | HG03190     | 56            | 23         | 1                   | 4               | 1               |
|                     | JPT            | HG03708     | 66            | 24         | 0                   | 3               | 0               |
|                     | KHV            | HG03711     | 52            | 25         | 1                   | 5               | 1               |
| EUR                 | CEU            | HG03800     | 55            | 17         | 1                   | 3               | 1               |
|                     | FIN            | HG04014     | 59            | 24         | 1                   | 2               | 1               |
|                     | GBR            | NA11830     | 83            | 26         | 1                   | 5               | 1               |
|                     | GIH            | NA18552     | 56            | 24         | 1                   | 5               | 1               |
|                     | IBS            | NA18868     | 53            | 21         | 0                   | 3               | 0               |
|                     | TSI            | NA19011     | 59            | 25         | 0                   | 4               | 0               |
| SAS                 | BEB            | NA19452     | 65            | 27         | 2                   | 6               | 1               |
|                     | ITU            | NA19741     | 83            | 29         | 1                   | 7               | 1               |
|                     | PJL            | NA20537     | 41            | 23         | 1                   | 4               | 1               |
|                     | STU            | NA21141     | 56            | 23         | 1                   | 5               | 1               |

**Supplementary Table 14 | Missense variants among 147 spliceosome genes.** The number of variant positions with at least one non-reference allele among all four archaics and 24 randomly sampled 1KG samples that was identified as a missense variant by Ensembl's Variant Effect Predictor. Superpopulation and population labels follow 1KG convention. n transcripts = number of transcripts with a missense variant, n Variants = number of missense variant, n Variants PolyPhen = number of damaging variants as measured by PolyPhen, n Variants SIFT = number of deleterious variants as measured by SIFT, n Variants Both = number of variants that were considered both damaging and deleterious by PolyPhen and SIFT, respectively.

| Tissue                                | n Vernot Ancient | n Vernot Introgressed | n Browning Ancient | n Browning Introgressed | GTEX Sample Size |
|---------------------------------------|------------------|-----------------------|--------------------|-------------------------|------------------|
| Adipose Subcutaneous                  | 530              | 25                    | 511                | 45                      | 663              |
| Adipose Visceral Omentum              | 451              | 12                    | 436                | 27                      | 541              |
| Adrenal Gland                         | 279              | 6                     | 275                | 11                      | 258              |
| Artery Aorta                          | 433              | 16                    | 423                | 27                      | 432              |
| Artery Coronary                       | 259              | 5                     | 258                | 6                       | 240              |
| Artery Tibial                         | 525              | 19                    | 508                | 40                      | 663              |
| Brain Amygdala                        | 120              | 2                     | 119                | 3                       | 152              |
| Brain Anterior cingulate cortex BA24  | 158              | 3                     | 158                | 3                       | 176              |
| Brain Caudate basal ganglia           | 226              | 7                     | 225                | 8                       | 246              |
| Brain Cerebellar Hemisphere           | 283              | 10                    | 275                | 19                      | 215              |
| Brain Cerebellum                      | 319              | 11                    | 317                | 13                      | 241              |
| Brain Cortex                          | 254              | 11                    | 252                | 12                      | 255              |
| Brain Frontal Cortex BA9              | 190              | 7                     | 188                | 9                       | 209              |
| Brain Hippocampus                     | 153              | 4                     | 150                | 7                       | 197              |
| Brain Hypothalamus                    | 186              | 5                     | 184                | 7                       | 202              |
| Brain Nucleus accumbens basal ganglia | 214              | 8                     | 213                | 9                       | 246              |
| Brain Putamen basal ganglia           | 172              | 4                     | 170                | 6                       | 205              |
| Brain Spinal cord cervical c-1        | 137              | 2                     | 135                | 4                       | 159              |
| Brain Substantia nigra                | 109              | 0                     | 108                | 1                       | 139              |
| Breast Mammary Tissue                 | 467              | 15                    | 450                | 34                      | 459              |
| Cells Cultured fibroblasts            | 477              | 16                    | 465                | 29                      | 504              |
| Cells EBV-transformed lymphocytes     | 231              | 9                     | 222                | 18                      | 174              |
| Colon Sigmoid                         | 390              | 8                     | 386                | 12                      | 373              |
| Colon Transverse                      | 384              | 13                    | 377                | 20                      | 406              |
| Esophagus Gastroesophageal Junction   | 368              | 15                    | 362                | 22                      | 375              |
| Esophagus Mucosa                      | 465              | 13                    | 453                | 26                      | 555              |
| Esophagus Muscularis                  | 463              | 19                    | 453                | 31                      | 515              |
| Heart Atrial Appendage                | 348              | 7                     | 336                | 19                      | 429              |
| Heart Left Ventricle                  | 295              | 6                     | 292                | 9                       | 432              |
| Kidney Cortex                         | 70               | 0                     | 70                 | 0                       | 85               |
| Liver                                 | 208              | 1                     | 206                | 3                       | 226              |
| Lung                                  | 526              | 16                    | 509                | 38                      | 578              |
| Minor Salivary Gland                  | 207              | 2                     | 203                | 6                       | 162              |
| Muscle Skeletal                       | 521              | 15                    | 504                | 34                      | 803              |
| Nerve Tibial                          | 557              | 25                    | 538                | 45                      | 619              |
| Ovary                                 | 233              | 4                     | 230                | 8                       | 180              |
| Pancreas                              | 274              | 6                     | 270                | 10                      | 328              |
| Pituitary                             | 349              | 12                    | 343                | 18                      | 283              |
| Prostate                              | 307              | 5                     | 303                | 9                       | 245              |
| Skin Not Sun Exposed Suprapubic       | 523              | 20                    | 507                | 39                      | 604              |
| Skin Sun Exposed Lower leg            | 572              | 18                    | 555                | 39                      | 701              |
| Small Intestine Terminal Ileum        | 254              | 5                     | 252                | 7                       | 187              |
| Spleen                                | 319              | 11                    | 311                | 20                      | 241              |
| Stomach                               | 321              | 7                     | 319                | 9                       | 359              |
| Testis                                | 681              | 20                    | 660                | 44                      | 361              |
| Thyroid                               | 581              | 21                    | 566                | 38                      | 653              |
| Uterus                                | 185              | 2                     | 184                | 3                       | 142              |
| Vagina                                | 188              | 1                     | 188                | 1                       | 156              |
| Whole Blood                           | 377              | 8                     | 363                | 24                      | 755              |

**Supplementary Table 15 | sQTL SAVs by allele origin.** The number of sQTL SAVs by allele origin for 49 tissues in GTEx, v8.
